1 **Title:** Distinct sequence patterns in the active postmortem transcriptome

2

3 **Authors:** Peter A Noble<sup>1\*</sup> and Alexander E. Pozhitkov<sup>2</sup>

4

5 <sup>1</sup>Department of Periodontics, University of Washington, Box 357444, Seattle, WA  
6 USA 98195

7

8 <sup>2</sup>City of Hope, Information Sciences - Beckman Research Institute, 4920 Rivergrade  
9 Rd., Irwindale, CA 91706.

10

11 **\*Correspondence to:**

12 Peter A Noble

13 Email: panoble2017@gmail.com

14 Phone: 206-409-6664

15

16 **ORCID:** PAN, 0000-0002-6013-2588

17 **ORCID:** AEP, 0000-0001-6566-6450

18

19 **Submitted:** March X, 2018

20

21 **Acknowledgments:** We thank Shivani Soni for reviewing earlier versions of the  
22 manuscript.

23

24 10 Figures, 6 Tables and 16 Online material.

25

26

27

28

29 **ABSTRACT**

30

31 Our previous study found more than 500 transcripts significantly increased in  
32 abundance in the zebrafish and mouse several hours to days postmortem relative to  
33 live controls. The current literature suggests that most mRNAs are post-  
34 transcriptionally regulated in stressful conditions, we rationalized that the  
35 postmortem transcripts must contain sequence features (3 to 9 mers) that are  
36 unique from those in the rest of the transcriptome – specifically, binding sites for  
37 proteins and/or non-coding RNAs involved in regulation. Our new study identified  
38 5117 and 2245 over-represented sequence features in the mouse and zebrafish,  
39 respectively. Some of these features were disproportionately distributed along the  
40 transcripts with high densities in the 3-UTR region of the zebrafish (0.3 mers/nt)  
41 and the ORFs of the mouse (0.6 mers/nt). Yet, the highest density (2.3 mers/nt)  
42 occurred in the ORFs of 11 mouse transcripts that lacked UTRs. Our results suggest  
43 that these transcripts might serve as ‘molecular sponges’ that sequester RNA  
44 binding proteins and/or microRNAs, increasing the stability and gene expression of  
45 other transcripts. In addition, some features were identified as binding sites for  
46 *Rbfox* and *Hud* proteins that are also involved in increasing transcript stability and  
47 gene expression. Hence, our results are consistent with the hypothesis that  
48 transcripts involved in responding to extreme stress have sequence features that  
49 make them different from the rest of the transcriptome, which presumably has  
50 implications for post-transcriptional regulation in disease, starvation, and cancer.

51

52

53 **KEY WORDS:** motifs, post-transcriptional regulation, stress response,  
54 postmortem gene expression, chaos game representation, zebrafish, mouse, 5’UTR,  
55 3’UTR, ORFs, molecular sponge.

56

57

58 **ABBREVIATIONS:** UTR, untranslated regions; ORFs, open reading frames; OP,  
59 overabundant transcript pool; CP, control transcript pool; FP, false positive; RBP,  
60 RNA binding proteins; ncRNA, non-coding RNA, miRNA, microRNA.

61

62

## 63 INTRODUCTION

64 Understanding regulatory circuits and how they influence transcriptional dynamics are  
65 important for comprehending the response of biological systems to stress such as  
66 starvation, disease, cancer and even death. Under stressful conditions, most (90%)  
67 mRNAs are regulated post-transcriptionally [1] -- presumably because it is more  
68 energetically favorable than regulation at the transcriptional level [2].

69 Two studies have recently shown that hundreds of transcripts increase in abundance in  
70 vertebrate organs/tissues in response to organismal death [3, 4]. These increases could be  
71 due to active transcription and/or post-transcriptional regulation of the nascent  
72 transcripts. Post-transcriptional regulation involves RNA binding proteins (RBPs) and  
73 non-coding RNAs (ncRNAs) [5, 6] that form complexes with RNA motifs and regions of  
74 secondary structure within the RNAs [7]. While the binding of RBPs to specific motifs  
75 in a transcript is well documented [8, 9, 10], the binding of ncRNA, in the form of  
76 microRNA [miRNA), circular RNA, or long ncRNA [lncRNA) to specific motifs within  
77 transcripts is less understood. Apparently, some mRNAs and ncRNAs act as “molecular  
78 sponges” that bind miRNAs preventing them from performing their functions. For  
79 example, miRNA-16 is sequestered by mRNAs encoded by the Tyrosinase-related  
80 Protein 1 (*Tyrl*) gene [11]. As a consequence, miRNA-16 tumour-suppressor functions  
81 are lost and cell proliferation occurs [12]. Another “sponge” example is lncRNA encoded  
82 by the *Meg3* gene that binds miRNA-664 counteracting its inhibitory effect on production  
83 of alcohol dehydrogenase [6]. These are examples of two RNAs acting as molecular  
84 sponges, -- yet, not all of the functions of ncRNAs are known at this time [13] -- other  
85 roles have been suggested [14, 15, 16].

86 Our previous study revealed that some transcripts increase in abundance with postmortem  
87 time [4]. As a step forward towards better understanding of possible mechanisms  
88 responsible for these increases, our present study examined sequence features [i.e., short  
89 mers) that are over- or under- represented within these transcripts. We recognize that  
90 short mers are not the only sequence features responsible for these increases – we begin  
91 with short mers because they are easily identified. That said other more complex features  
92 are probably yet to be discovered.

93 We rationalized that some mers are over- or under- represented in these transcripts  
94 because they serve as binding sites for RBPs or ncRNAs involved in post-transcriptional  
95 regulation. To investigate this phenomenon, we examined the presence/absence/  
96 frequencies of mers up to 9 nt in length and compared them to controls, which consisted  
97 of random draws of transcripts from the rest of the transcriptome (i.e., those not  
98 increasing in abundance in response to stress). The results show that several thousand  
99 mers are over-represented in the postmortem transcripts of the zebrafish and mouse.  
100 Further examination of the frequencies of the mers show that some transcripts have more  
101 unique mers than others, and that the density of the unique mers varies by transcript and  
102 region (i.e., 5'UTR, ORF, 3'UTR).

103

## 104 METHODS AND MATERIALS

105 A schematic overview of the experimental design for the study is provided in **Fig 1**.

106

107

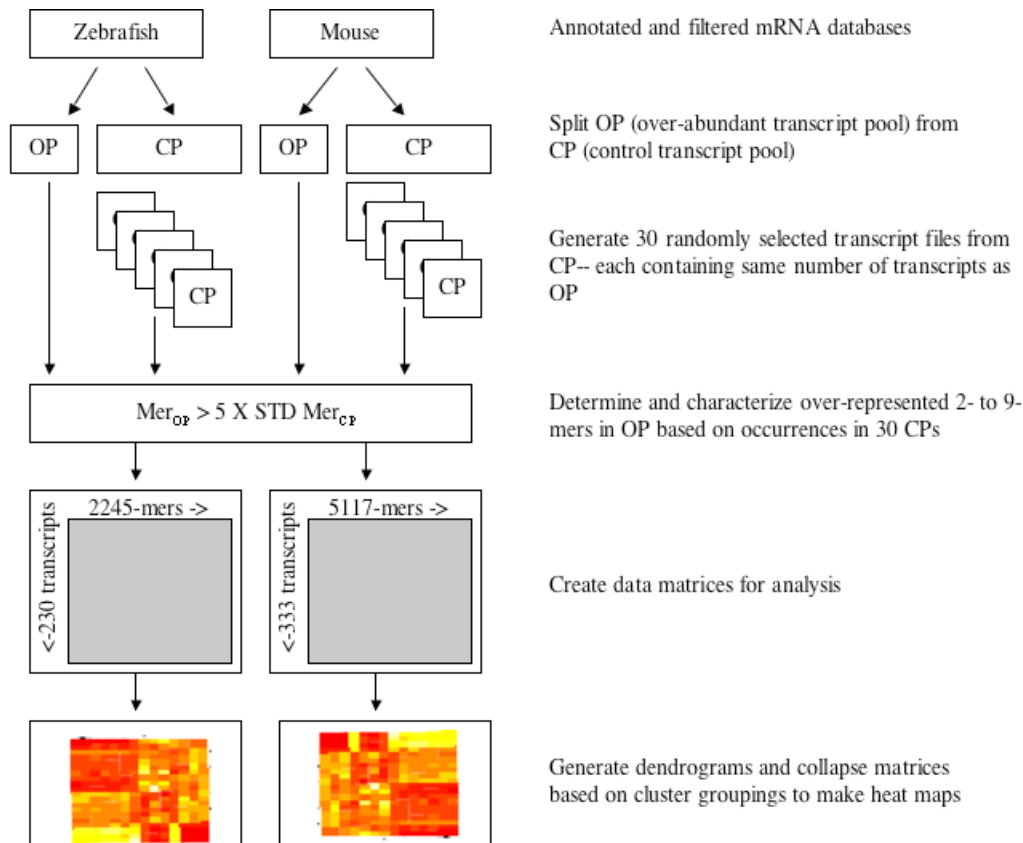

108

109

**Fig 1. Schematic representation of the study experimental design.**

110

### 111 Dataset assembly

112 Messenger RNA transcripts of *Danio rerio* (GRC210.89) and *Mus musculus*  
113 (GRCm38.p5) with annotations were downloaded from NCBI. Transcript sequences  
114 containing ambiguous nucleotides (i.e., 'N's) and those less than 100 nt in length were  
115 removed. The final "clean" data sets were used for bioinformatic analyses.

### 116 Extracting 2- to 9-mers from transcript sequences

117 An alignment-free sequence comparison method called 'Chaos Genome Representation'  
118 (CGR) [17, 18, 19] was used to extract mers from the transcript sequences because it was  
119 more practical (computationally efficient) than string-based search algorithms (see Proof  
120 in Online Resource 1). CGR is an iterative mapping technique that processes nucleotides  
121 in a sequence to find the  $x$ -,  $y$ - coordinates for their position in a continuous space. The  
122  $x$ - and  $y$ - coordinates can then be used to recover sequence, which in this study were  
123 oligomers. Once the coordinates of a sequence are known, the presence/absence/

124 frequency of a mer of any size in a transcript sequence can easily be determined, as  
125 demonstrated below.

### 126 **Reading a sequence into CGR space.**

127 The processing of a transcript sequence involves converting each nucleotide into  $x$ - and  
128  $y$ - coordinates and assembling the coordinates into a CGR database. For example, the  
129 sequence 'AAACC' is represented by the  $x$ - and  $y$ - coordinates of +0.53125 and -  
130 0.53125, respectively. The coordinates are determined by reading the sequence into CGR  
131 space. The space is confined by the four possible nucleotides as vertices of a binary  
132 square with  $x$ ,  $y$  position (-1, +1) being the vertex A, (+1, +1) being the vertex T, (-1, -1)  
133 being the vertex G and (-1, -1) being the vertex C. The position of a nucleotide in the  
134 fragment is calculated by moving a pointer to half the distance between the previous  
135 position and the current binary representation.

136 An example. Starting at point  $x$ ,  $y$  (0, 0), the first nucleotide 'A' is plotted at half way to  
137 the vertex of A (-1, +1), which is coordinate (-0.5, +0.5). The next nucleotide is also 'A',  
138 therefore half way from the coordinate (-0.5, +0.5) to vertex of A (-1, +1) is (-0.75,  
139 +0.75). The next nucleotide is also 'A' so half way from the coordinate (-0.75, +0.75) to  
140 the vertex of A (-1, +1) is the coordinate (-0.875, +0.875). The next nucleotide 'C', so  
141 half-way from the coordinate (-0.875, +0.875) to the vertex of C (-1, -1) is the coordinate  
142 (+0.0625, -0.0625) and so on up to the last nucleotide of the sequence with the last  
143 coordinates of  $x=+0.53125$  and  $y=-0.53125$ . A depiction of reading a sequence into CGR  
144 space is shown in Figure 1a of the Almeida et al. [19] study.

145 Once all the sequences have been read into CGR space and their coordinates stored in a  
146 database, it is possible to determine the presence/absence/frequency of mers by their  
147 coordinates and mer length (i.e., 1/resolution), which is outlined in the Mer analysis  
148 section below.

149 The software for the processing of nucleotide sequences into coordinates and recovering  
150 the sequences from the coordinates is available: <http://peteranoble.com/software.html>.  
151 Details on the mathematics of iterative mapping of nucleotide sequences have been  
152 previously published [19].

### 153 **Mer analysis**

154 Mer analysis determines the presence/absence/frequency of a mer of length  $z$  (where  $z$  is  
155 2 to 9) in a gene transcript.

156 Finding a specific mer in a transcript. Let us assume that a database of the  $x$ -,  $y$ -  
157 coordinates of the target sequence has been assembled and we want to determine the  
158 presence/absence of the mer 'AAACAA' in a target sequence. There are three steps.

159 First, we process the mer AAACAA into CGR space to find its  $x$ -,  $y$ - coordinates, which  
160 are -0.734375 and 0.734375, respectively.

161 Second, we determine the resolution of the search, which depends on mer length (i.e.,  
162 resolution =  $2^{(\text{mer length})}$ ). A 6-mer requires a resolution of 64. The inverse of the  
163 resolution (1/resolution) is the CGR space around the coordinates that contain the specific  
164 mer. The CGR space around the coordinates is expressed by the following equation:

165

166 
$$x' = x \pm \frac{1}{r}, y' = y \pm \frac{1}{r}, \text{ where } r \text{ is } 2^{\text{mer\_length}}$$

167

168 For the 6-mer AAACAA

169

170 
$$x' = -0.734375 \pm \frac{1}{64}, y' = 0.734375 \pm \frac{1}{64}$$

171

172 Third, the coordinates and CGR space of the mer is then used to search the CGR space of  
173 the target transcript sequence in the database. Any transcript that have coordinates within  
174 the box of  $x'$  and  $y'$  of the mer represents the sequence 'AAACAA'. Furthermore, one  
175 can tally the number of hits within the box, which represents the frequency of the mer in  
176 a target sequence. We verified the presence of the mers in the identified target sequences  
177 by textual comparisons.

## 178 **Statistical and bioinformatics analyses**

179 Analyses were conducted using SAS/JMP (version 7.0.2), R (version 3.4.0) and  
180 Microsoft Excel (versions 14.3.0 and 11.6). Hierarchical two-way cluster analysis was  
181 conducted on the binary matrices using Wards linkage method in SAS/JMP with default  
182 settings for cluster assignments. The resulting binary matrices were collapsed by their  
183 corresponding cluster assignments using a custom-designed program in C++. The  
184 resulting files were scaled to an average of zero and standard deviation of 1 in MS Excel  
185 and transferred to R to produce the heatmaps with no scaling. Network analysis was  
186 conducted using Gephi 0.9.2.

187

## 188 **Identification of 5'UTR, ORFs and 3'UTR and RNA motifs in transcripts**

189 RegRNA 2.0 was used to identify functional RNA motifs and sites in the gene transcripts  
190 [20]. The server identifies splicing sites, splicing regulatory motifs, polyadenylation  
191 sites, transcriptional motifs, translational motifs, UTR motifs, mRNA degradation  
192 elements, RNA editing sites, riboswitches, RNA cis-regulatory elements, RNA-RNA  
193 interaction regions, and open reading frames using an integrated software package  
194 consisting of ~20 programs.

195 Nucleotide sequences of the transcripts were individually submitted to the server, default  
196 search parameters specified, and tab-delimited results downloaded to a computer. The  
197 results file contained global and local functions of the motifs and sites, their location in  
198 the transcript sequence, motif length and the sequence of the motif. Sequences of the  
199 unique mers in a transcript were matched to the sequence information of the motifs in the  
200 transcripts.

201

## 202 **RESULTS**

203 Our previous study on postmortem gene expression dynamics [4] used a 60-mer  
204 oligonucleotide microarray to measure transcript levels. These perfectly matched probes  
205 were used in the present study to identify gene transcripts in the assembled datasets of the  
206 mouse and zebrafish (Online Resource 2). A certain portion of the transcripts has been  
207 shown to significantly increase in abundance after organismal death relative to live  
208 controls [4]. Henceforth, these transcripts are referred to as the over-abundant pool (OP),  
209 and transcripts not in this category are referred to as transcripts of the control pool (CP).  
210 Online Resources 3 to 6 contain probes and their corresponding transcripts. In total, the  
211 OP of the mouse and zebrafish consisted of 333 and 230 gene transcripts, respectively,  
212 and the CP consisted of 32,611 and 27,433 transcripts, respectively.

213 To determine if transcript length was a contributing factor when comparing different  
214 transcripts in the OP to those in the CP, we randomly selected two sets of transcripts from  
215 the CP (each set consisting of 333 gene transcripts for the mouse and 230 gene transcripts  
216 for the zebrafish) and compared the lengths of each set to those from the OP. No  
217 significant differences were found (two-tailed T-tests with unequal variance;  $\alpha=0.05$ )  
218 in either the mouse or the zebrafish, which rules out transcript length as a factor affecting  
219 Mer analyses (Online Resource 7).

## 220 Mer analyses

221 The occurrences of 2- to 9-mers in gene transcripts of the OP were compared to those of  
222 the controls (i.e., CP). In the zebrafish, the controls consisted of 2- to 9-mers found in 30  
223 sets of 230 transcripts that were randomly drawn (with replacement) from the CP of the  
224 zebrafish (Online Resource 8). In the mouse, the controls consisted of 2- to 9-mers found  
225 in 30 sets of 333 gene transcripts that were randomly drawn (with replacement) from the  
226 CP of the mouse (Online Resource 9).

227 To test the assumption that the 30 sets of random draws sufficiently represented the  
228 diversity of transcripts found in each organism, we classified an additional 3 sets of 333  
229 and 230 transcripts from the CPs of the mouse and zebrafish, respectively (without  
230 replacement) (Online Resources 10 and 11). Only transcripts not previously drawn were  
231 used in this test.

232 The average count of individual mers from the random draws of the CPs were tabulated  
233 into a spreadsheet and compared to the counts of individual mers in the OPs of each  
234 organism. The arbitrary criterion used to identify ‘unique’ mers as either under- or over-  
235 represented was: a mer in the OP having less than or greater than 5 times the standard  
236 deviation of the average abundance of a corresponding mer in the CPs.

## 237 Mer counts

238 Given that 2-mers have 16 possible nucleotide combinations (i.e., AA, AT, AC, ... TT)  
239 and 3-mers have 64 combinations (i.e., AAA, AAT... TTT), all short mers (2 to 3 nt)  
240 were anticipated to be present in transcripts of the OP and CPs, and therefore, no  
241 differences between the pools should be observed. Differences between the pools  
242 however, should change with increasing mer length presumably due to real differences or  
243 random chance (i.e., false-positives; FP).

244 A maximum difference between the OP and CP pools was 6-mers ( $n=74$  transcripts) for  
245 the mouse and 5-mers ( $n=18$  transcripts) for the zebrafish (Table 1, Fig 2A). When



246 normalized to the number of possible mer combinations, the maximum difference was 7-  
247 mers for the mouse and 5-mers for the zebrafish (**Fig 2C**). Hence, mers of 5 to 7 nt in  
248 length are optimal for distinguishing between the pools.

249 **Table 1. Average  $\pm$  standard deviation of 333 gene transcripts in the mouse**  
250 **and 230 transcripts in the zebrafish that contained unique mers by group (OP**  
251 **vs. CP). The absolute difference in unique mer counts by group and mer**  
252 **length is shown.**

| Animal | Mer length | Num transcripts (OP) | Num transcripts (CP) | Absolute Difference |
|--------|------------|----------------------|----------------------|---------------------|
| Mouse  | 2          | 333 $\pm$ 0.25       | 333 $\pm$ 0.4        | 0 $\pm$ 0.1         |
|        | 3          | 330 $\pm$ 6.9        | 329 $\pm$ 7.9        | 2 $\pm$ 3.0         |
|        | 4          | 304 $\pm$ 30.3       | 304 $\pm$ 30.4       | 7 $\pm$ 7.2         |
|        | 5          | 227 $\pm$ 56.0       | 226 $\pm$ 55.9       | 13 $\pm$ 9.5        |
|        | 6          | 119 $\pm$ 52.5       | 117 $\pm$ 50.7       | 74 $\pm$ 45.2       |
|        | 7          | 43 $\pm$ 27.8        | 42 $\pm$ 25.5        | 6 $\pm$ 7.3         |
|        | 8          | 13 $\pm$ 10.8        | 12 $\pm$ 9.1         | 3 $\pm$ 4.2         |
|        | 9          | 3 $\pm$ 4.0          | 2 $\pm$ 1.9          | 3 $\pm$ 3.3         |
|        | Zebrafish  | 2                    | 230 $\pm$ 0.0        | 230 $\pm$ 0.1       |
| 3      |            | 230 $\pm$ 0.6        | 229 $\pm$ 1.8        | 1 $\pm$ 1.5         |
| 4      |            | 220 $\pm$ 11.8       | 211 $\pm$ 15.5       | 9 $\pm$ 6.1         |
| 5      |            | 166 $\pm$ 35.7       | 148 $\pm$ 33.5       | 18 $\pm$ 8.1        |
| 6      |            | 81 $\pm$ 34.9        | 70 $\pm$ 29.4        | 12 $\pm$ 8.9        |
| 7      |            | 27 $\pm$ 17.5        | 23 $\pm$ 14.2        | 5 $\pm$ 5.2         |
| 8      |            | 8 $\pm$ 6.6          | 7 $\pm$ 5.0          | 2 $\pm$ 2.5         |
| 9      |            | 2 $\pm$ 2.4          | 2 $\pm$ 1.5          | 1 $\pm$ 1.2         |

253  
254 With increasing mer length, the number of ‘unique’ mers (i.e., over-/under-represented  
255 mers in the OP) increased (**Fig 2B**).

256 To determine the number of FPs as a function of mer length and test the integrity of the  
257 experimental design, we randomly draw three additional sets of transcripts from the CP  
258 (without replacement) and retained only transcripts not used in the previous analyses.  
259 For the mouse, each set consisted of 333 transcripts, and for the zebrafish, each set  
260 consisted of 230 transcripts. In this experiment, ‘over-/under- represented’ mers are FPs  
261 because the transcripts originated from the control transcript pool (i.e., the CP). To help  
262 explain the results of this experiment, let us consider the mer ATACCGG in the mouse.  
263 This mer would be considered ‘unique’ if its count were more or less than 5 times the  
264 standard deviation of the average from the CP, which is based on of 30 sets of 333  
265 transcripts (Online Resource 11). The average and standard deviation in the CP was 8  $\pm$   
266 3.5, meaning one would expect to find it an average of 8 times in random draws of 333  
267 mouse transcripts. Five times the standard deviation is 17.5, therefore the range of  
268 critical values for the mer count is: -9.5 and 25.5. In the OP, the mer occurred 31 times  
269 and is therefore considered ‘unique’ based on the stated criterion (i.e., the count is greater  
270 than 25.5).

271



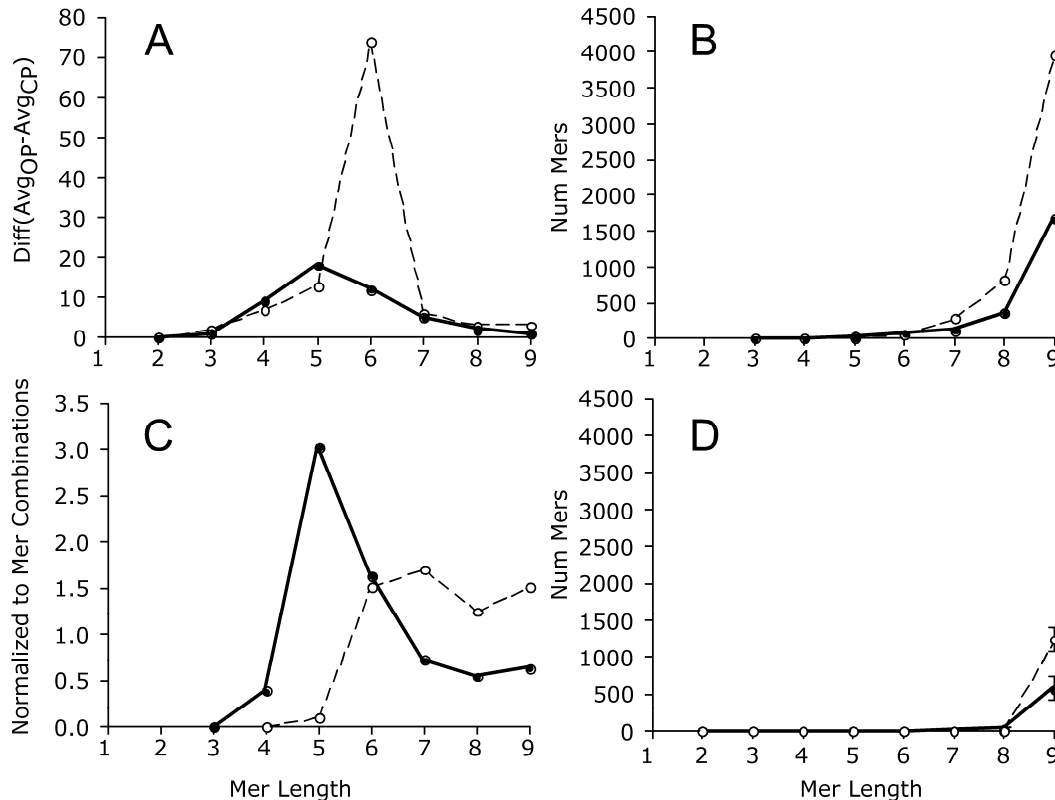

272  
273 **Fig 2. Mer counts as a function of mer length. Hatched line, mouse; solid line,**  
274 **zebrafish. Panel A, Difference in average mer counts by group (OP vs. CP); Panel**  
275 **B, individual mer counts that were 5 time stdev of average of the CP; Panel C, is the**  
276 **same results as panel B except normalized to the number of possible mer**  
277 **combinations and shown as a percentage; Panel D, number of mer counts that were**  
278 **5 times stdev of the average CP due to random chance; average  $\pm$  stdev of 3 random**  
279 **selections (without replacement).**

280

281 To test the experimental design and check for FPs, mers were counted in three additional  
282 random draws from the CP. The mer ATACCGG, for example, occurred in 7 of the 333  
283 transcripts in one set, 3 of the 333 transcripts in the second set, and 10 of the 333  
284 transcripts in the third set (Online Resource 11). Since none of these counts are outside  
285 the criterion (the average  $\pm$  standard deviation for this mer was  $8.1 \pm 3.49$ ), there is no  
286 FPs for this mer. Of note, this procedure was repeated for all unique mers in the  
287 transcript pools of the mouse and zebrafish, respectively.

288 The results show that the number of FPs in the OP was close to zero for mer lengths of up  
289 to 8 bp (compare **Fig 2D** to **2B**). Therefore, while there is a possibility that some mers in  
290 the OP are FPs, the number was small (e.g., 8-mers: 1.0% are FPs in the mouse and 8.9%  
291 are FPs in the zebrafish).

292 When the length of mers was 9, however, the number of FPs significantly increased to an  
293 average ( $\pm$  std) abundance of  $1240 \pm 167.2$  for the mouse (31.3% FP) and  $571 \pm 158.8$  for  
294 the zebrafish (34.2% FP).

295 The results are consistent with the notion that unique mers can be identified in the OP by  
296 comparing them to random draws of mers from the CP. However, FPs increased with  
297 mer length. Taken together, over- and under- represented mers were identified in the OP  
298 and many are 5 to 7 nt in length.

### 299 Survey of the unique mers

300 The survey of the OP identified 5,117 unique mers in the mouse and 2,245 mers in the  
301 zebrafish (Table 2). Normalized to the total number of combinations of 3- to 9-mers  
302 ( $n=349,504$ ), this represents ~1.5% of the total mers in the mouse and ~0.6% in the  
303 zebrafish. Of note, 47 of the unique mers were common to both organisms (Table 3).

304

305 **Table 2. Number of unique mers in transcripts of the OP by mer length and**  
306 **organism.**

| Mer length | Zebrafish | Mouse |
|------------|-----------|-------|
| 4          | 1         | 0     |
| 5          | 31        | 1     |
| 6          | 67        | 62    |
| 7          | 118       | 279   |
| 8          | 356       | 819   |
| 9          | 1672      | 3956  |
| Sum        | 2245      | 5117  |

307

308

**Table 3. Unique mers common to transcripts of the OP for the zebrafish and mouse.**

| Mer length | Mer                                                                                                                                                                                                                                                                                                                                               |
|------------|---------------------------------------------------------------------------------------------------------------------------------------------------------------------------------------------------------------------------------------------------------------------------------------------------------------------------------------------------|
| 6          | AAAUAC, AACGAA, ACAUAA                                                                                                                                                                                                                                                                                                                            |
| 7          | UGUGAAC, AUCUCCA, AAAUACA, UAGGUUA, CAUGAAA                                                                                                                                                                                                                                                                                                       |
| 8          | CAGAAAGC, GUAAGUC, GCACAAAG, ACGAAUAC, AGAAGAGU, CAUGUGAA, AAAUACAU, AUAGGUUA                                                                                                                                                                                                                                                                     |
| 9          | CCAAUGUGG, CUAUGAAGG, AAGUCCCAG, CUGACAGUC, UUCUCUGUG, GUUUCUGUG, CUAUGUCUG, AUACAAGUG, GCAAGGUUC, CAUGUGAAC, UCUAUGAAG, AUAGGUUAC, UCUGGGGCA, CCUGCUGCU, UAUCAUCGA, AAAAGAUA, AUUCA AUGU, AAGAAAUCA, ACAAUAUA, CUUCUCCA, CAGAACCAU, UUUAACCAA, CAUGCAGAA, CUGGAAGAA, AUACAUCAA, AAAGAUCAU, CAGUAUGAA, AGAAAUCAU, CCUACGAAU, GUCCUGAAA, AACAUGAAA |

309

310

311

312

313

314

In fact, some of these mers are reverse complements to one another, which is of interest because they might form secondary structures and play roles in post-transcriptional regulation (Table 4). In the mouse, 218 of the 5,117 mers (4.3 %) reverse complemented one another. In the zebrafish, 31 of the 2,245 mers (1.4 %) were reverse complements.

315 **Table 4. Unique mers that were reverse complements by length and organism.**

| Organism  | Mer length | Mers                                                                                                                                                                                                                                                                                                                                                                                                                                                                                                                                                                                                                                                                                                                                                                                                                                                                                                                                                                                                                                                                                                                                                                                                                                                                                                                                                                                                                                                                                       |
|-----------|------------|--------------------------------------------------------------------------------------------------------------------------------------------------------------------------------------------------------------------------------------------------------------------------------------------------------------------------------------------------------------------------------------------------------------------------------------------------------------------------------------------------------------------------------------------------------------------------------------------------------------------------------------------------------------------------------------------------------------------------------------------------------------------------------------------------------------------------------------------------------------------------------------------------------------------------------------------------------------------------------------------------------------------------------------------------------------------------------------------------------------------------------------------------------------------------------------------------------------------------------------------------------------------------------------------------------------------------------------------------------------------------------------------------------------------------------------------------------------------------------------------|
| Zebrafish | 5          | UGUAU, AUACA                                                                                                                                                                                                                                                                                                                                                                                                                                                                                                                                                                                                                                                                                                                                                                                                                                                                                                                                                                                                                                                                                                                                                                                                                                                                                                                                                                                                                                                                               |
|           | 6          | GUAUUU, UCAAAA, UUUUGA, AAUAC, AUUUUU, AUAUUA, AAAAAU                                                                                                                                                                                                                                                                                                                                                                                                                                                                                                                                                                                                                                                                                                                                                                                                                                                                                                                                                                                                                                                                                                                                                                                                                                                                                                                                                                                                                                      |
|           | 7          | UGUAUUU, CGUUGUU, CAUUUUG, CAAAAUG, ACAAAAU, AACACG, AUUGUAU, AUACAAU, AUUUUGU, AAUACA                                                                                                                                                                                                                                                                                                                                                                                                                                                                                                                                                                                                                                                                                                                                                                                                                                                                                                                                                                                                                                                                                                                                                                                                                                                                                                                                                                                                     |
|           | 8          | CAUUUUGA, UCAAAAUG                                                                                                                                                                                                                                                                                                                                                                                                                                                                                                                                                                                                                                                                                                                                                                                                                                                                                                                                                                                                                                                                                                                                                                                                                                                                                                                                                                                                                                                                         |
|           | 9          | GGCGGCAAG, CCAGGCUCA, CGUCUAGGU, GCUAGGGAC, GUCCCUAGC, CUUGCCGCC, ACCUAGACG, UGAGCCUGG, AGUAGGCUA, UAGCCUACU                                                                                                                                                                                                                                                                                                                                                                                                                                                                                                                                                                                                                                                                                                                                                                                                                                                                                                                                                                                                                                                                                                                                                                                                                                                                                                                                                                               |
| Mouse     | 6          | CUAUAG, AUGCAU                                                                                                                                                                                                                                                                                                                                                                                                                                                                                                                                                                                                                                                                                                                                                                                                                                                                                                                                                                                                                                                                                                                                                                                                                                                                                                                                                                                                                                                                             |
|           | 7          | ACCUAUA, AUGACUG, CAGUCAU, GUCUCUA, UAGAGAC, UAUAGGU, UCUAGAA, UUCUAGA                                                                                                                                                                                                                                                                                                                                                                                                                                                                                                                                                                                                                                                                                                                                                                                                                                                                                                                                                                                                                                                                                                                                                                                                                                                                                                                                                                                                                     |
|           | 8          | CCAUGACU, GGUUACAU, CCUAUAGG, GUCUCUAC, GUAGAGAC, CUUCUAGA, CUAGAAGU, CUAUGAC, GUAUGAAU, CUAUAGGU, ACCUAUAG, UCUGCAGA, AGUCAUGG, AGUCAUAG, UCUAGAAG, ACUUCUAG, UUCUAGAA, AUGUAACC, UUUGCAA, AAUGCAU, AAAGCUUU, AUUCAUAC                                                                                                                                                                                                                                                                                                                                                                                                                                                                                                                                                                                                                                                                                                                                                                                                                                                                                                                                                                                                                                                                                                                                                                                                                                                                    |
|           | 9          | CGGAGAGAA, GCGAAGACA, CCCUUCUUC, GCUGCUGCU, CCUGGAACU, CCAGUGUGA, CCUGAGUUC, CCUCUUCUG, GGUCUUCAA, CCUUGAACU, CCAACAUA, GGUUUCUCU, GGUUACAGU, GGUUACAUU, GAGGGCAUC, GUGGCUCAC, CAGGAAGA, CUGCUGCUG, CAGCAGCAG, CUCCAGCAU, CUGCUCUCU, CUGCAGAAG, CAGGAGAAA, CUCCUUCU, CAGGAAGCA, CAGGAAGGA, GUGAGCCAC, GUCUCCUGU, GAGUGGUAG, GUCUCCAAA, CACAGAGAA, CUGAGUUA, CAGAGAAA, GUCUUCGCU, CAGAAGAGG, CUGAAGACA, GUCUUCAGA, CUGAAGAUG, CAGAAGAUG, CAGAAAGCA, CAGUAUGAA, GAUGCCCUC, CUUCCCAUC, GAUGGGAAG, CUACCACUC, CUUCCUCU, GAACCUUUU, CUUCUGCAG, CUUGAGGAA, GAACUCAGG, GAACACACA, GAAGACACA, CUUCACUUG, CAAGUGAAG, GAAGAAGGG, CAUCUUCUG, CAUCUUCAG, CUUCUAGAA, GAAGAUGAU, GAAGAAGAA, CAAAGCCUU, CAAAGACUU, CAAACUUCU, GUUACAUUU, GUAAGACU, CAAAUGUAA, CUUUUAAAA, UCCCAGCAA, UGGGAAGGA, AGCGAAGAC, UGCUGGGAA, AGCAGCAGC, UGCUGCUGU, UCCUGCAA, UGCAGAAGA, UCCUUCCCA, UCCUUCUG, UGCUUCCUG, AGGAAGGAG, UGCUUUCUG, ACAGCAGCA, ACAGGAGAC, ACACCAACA, AGAGAGCAG, UCACACUG, UCUCUGUGU, ACACAGAGA, UGUGUCUUC, UGUGUGUUC, ACAGAGAAA, UGUCUUCGC, UCUGAAGAC, UGUCUUCAG, ACUGUAACC, AGAGAAACC, ACUGUUUCU, ACACAUACA, AGUCAUAGU, AGAGUUUCU, AGUCUUUAC, UCUUCCCUG, AGUUCAGG, UGUUGGUGU, UCUUCUGCA, UGAACUCAG, UCUUCACAA, UGAUGUGUU, UGAUGUUGG, AGUUAAGG, UCUAGAAGU, UCAUCUUCU, UCAUCUUA, UGUUCUUA, UGAAGUUCU, UGAAGAUGA, UGAAGAACA, ACUUCUAGA, AGUUGUUCU, AGAACUUA, AGAACACU, AGAAGAUGA, AGAAGUUUG, UGUAUGUGU, ACUAUGACU, AGAAACUCU, AGAAACAGU, AGUAUGAAU, UCAAAAACA, UGUUUUUGA, UGUUAUAAA, UCCCAGCA, AAGGCUUUG, |

|  |  |                                                                                                                                                                                                                                                                                                                                                                                                                                                                                                                                                                                                               |
|--|--|---------------------------------------------------------------------------------------------------------------------------------------------------------------------------------------------------------------------------------------------------------------------------------------------------------------------------------------------------------------------------------------------------------------------------------------------------------------------------------------------------------------------------------------------------------------------------------------------------------------|
|  |  | UUGCUGGGA, AUGCUGGAG, UCCUCAAG, UUGCAGAAA, AAGCAGUUA, UCCUUCUU, AAGAGGAAG, UUCUCUCCG, UUCUCUGUG, UUGUGAAGA, AACACAUA, AAGUCUUUG, AAGAAGGAA, UUGAAGACC, UUCUUCUUC, UUCUAGAAG, AUCAUCUUC, AUCAUGAAA, UUCAUACUG, UUGUUUUUU, AAGUUAUUA, AAAGCCUUU, AAAGGCUUU, UUUGCAGGA, UUUGGAGAC, AAAGCUUUU, UUUCUCCUG, UUUCUGCAA, UAACUGCUU, UUUCUCUGU, AAAGUCUUU, AAAGACUUU, UUUCAUGAU, AAUGUAACC, AUUCAUACU, UUACAUUUG, UUUCAAAAA, UAUGUAUUU, AAAAGGUUC, AAAAGCUUU, UUUUCUCUG, AAAUGU AAC, UUUUCAAAA, UUUUGUUUU, UUUUGAAAA, AAAACAAAA, UUUUUGAAA, AAAUACAUA, UAAUAACUU, AAAAACA AA, UUUUAACA, UUUUAAAAG, UUUUUUUA, UUA AAAAA |
|--|--|---------------------------------------------------------------------------------------------------------------------------------------------------------------------------------------------------------------------------------------------------------------------------------------------------------------------------------------------------------------------------------------------------------------------------------------------------------------------------------------------------------------------------------------------------------------------------------------------------------------|

316

### 317 **Number of unique mers per transcript**

318 The distribution of the unique mers was investigated to determine if they were found in  
319 all transcripts of the OP, or just a few. In other words, *is the distribution of unique mers*  
320 *uniform across all transcripts?* To address this question, we compared their distributions  
321 in both transcript pools (i.e., OP and CP). Here we assumed that the corresponding  
322 unique mers in transcripts of the CP should approximate a skewed (Poisson) distribution  
323 because they are relatively rare occurrences. The controls in this experiment were the  
324 three sets of random draws (with replacement) from the CP. We also examined the  
325 multiple occurrences of unique mers in the OP since a unique mer might occur multiple  
326 times in the same transcript.

327 In the zebrafish, the frequencies of the unique mers per transcript varied between pools  
328 (**Fig 3**). These findings indicate that not all transcripts in the OP have the same number  
329 of unique mers – i.e., the number of unique mers in a transcript was not uniform. In the  
330 OP, the maximum bin was 150 while the maximum bin in the CP was 100. Some  
331 transcripts of the OP have more than twice the number of unique mers in the 200, 250,  
332 and 300+ bins than those of the CP. Therefore, some zebrafish transcripts in the OP have  
333 many more unique mers than others.

334 In terms of multiple occurrences of unique mers in the zebrafish, the distributions  
335 differed by pool also, with multiple unique mers occurring within the same transcript  
336 when compared to controls (**Fig 3B**). For example, about 87 of the OP transcripts had  
337 more than 300 multiple unique mers compared to about 40 in the CP (**Fig 3D**). Hence,  
338 not only are there many more unique mers in the OP but, in some cases, there are  
339 multiple occurrences of the same mer in the same transcript.

340 In the mouse, the frequency distribution of unique mers per transcript was also different  
341 between the pools (**Fig 4A**). Specifically, there was almost double the number of unique  
342 mers in the 200 bin of the CP than the OP, about the same number of unique mers in the  
343 400 bin, and twice (or more) the number in the 600, 1000, and 1200+ bins of the OP than  
344 the CP (**Fig 4C**). This finding is consistent with those of the zebrafish – i.e., there are  
345 many more unique mers in the OP than the CP.

346 In terms of the multiple mer occurrences in the mouse, the results were different from the  
347 zebrafish; in general, there was little change between the histogram of the unique and

348 multiple mers (compare **Fig 3A to 3b**) – meaning that in contrast to the zebrafish, most of  
349 the unique mers did not occur multiple times in the same transcript sequence. Of note,  
350 this was not true for all cases as the 1200+ bin was somewhat bigger in the **Fig 4B** than  
351 **4A**. However, when compared to **Fig 3B to 3A**, there is a substantial difference between  
352 unique and multiple mers in the zebrafish. The presumed reason for this disparity is that  
353 in the mouse, the unique mers tend to be longer in length than those in the zebrafish  
354 (**Table 1, Fig 2C**) and the longer the length, the less frequent its occurrence.  
355

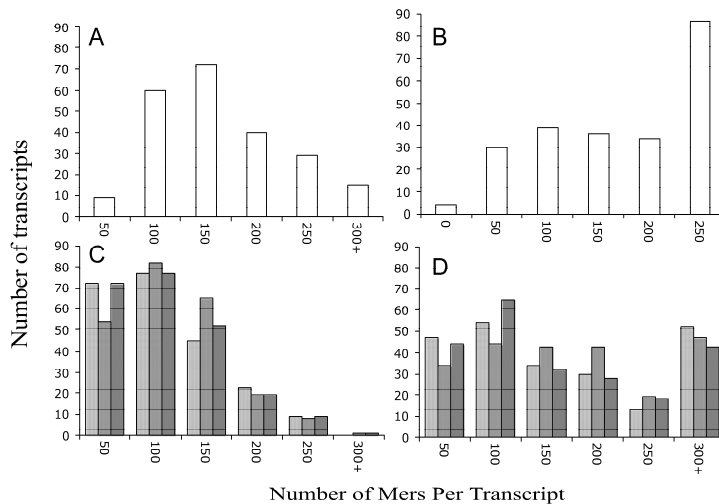

356  
357  
358  
359  
360  
361

**Fig 3. Distribution of unique mers per gene transcript in the zebrafish. A, unique mers in OP; B, multiple unique mers in OP; C, unique mers in CP (3 independent random selections; each as a different shade of grey); D, multiple unique mers in CP (3 independent random draws).**

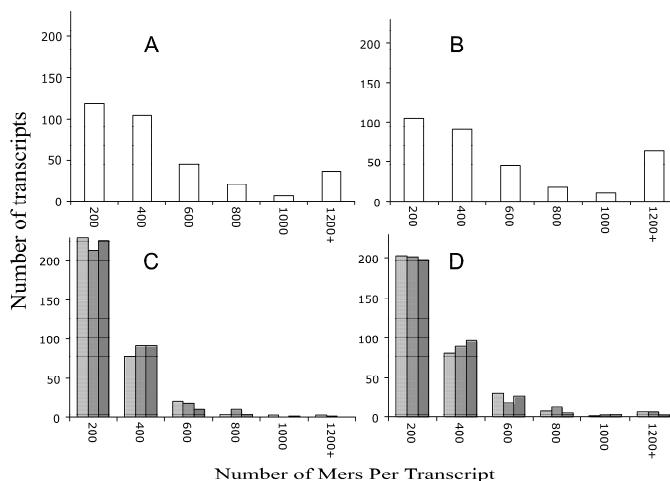

362  
363  
364  
365  
366

**Fig 4. Distribution of unique mers per gene transcript in the mouse. A, unique mers in OP of the mouse; B, multiple unique mers in OP of the mouse; C, unique mers in CP of mouse (3 independent random selections; each displayed as a different shade**

367 **of grey); D, multiple unique mers in CP of the mouse (3 independent random**  
368 **draws).**

369 Taken together, the distribution of unique mers in the OP differs from those in the CP.  
370 Furthermore, there appears to be differences in multiple unique mers of these transcripts  
371 in the zebrafish but less so in the mouse.

### 372 **Groups of unique mers in the OP transcripts**

373 Based on the previous analyses, we rationalized that some transcripts in the OP might  
374 share the same unique mers. To investigate the relationships among the OP transcripts  
375 and the unique mers (in binary presence/absence format), we constructed matrices and  
376 then performed two-way hierarchical clustering. The matrix for the zebrafish consisted  
377 of 230 rows of transcripts by 2245 columns of unique mers (Online Resource 12), and the  
378 matrix for the mouse consisted of 333 rows of transcripts by 5117 columns of unique  
379 mers (Online Resource 13).

380 The cluster analysis of the zebrafish identified 14 groups of transcripts and 20 groups of  
381 mers with high similarities, and the analysis of the mouse yielded 16 groups of transcripts  
382 and 20 groups of mers. The groups were collapsed by summation. For example, group A  
383 of the transcripts in the zebrafish consisted of 36 transcripts and Set 1 of the mers  
384 consisted of 25 unique mers. In total,  $25 \times 36 = 900$  combinations, out of which 119  
385 were actual occurrences of mers in the said transcripts (Online Resource 14), meaning  
386 there were 119 occurrences in the collapsed group. We summed groups A to N and mer  
387 sets 1 to 20 to form a collapsed matrix of 14 columns of transcript groups by 20 rows of  
388 mer sets. The same procedure was repeated for the mouse. The collapsed groups were  
389 normalized by row (see Materials and Methods section) to produce the data for the heat  
390 maps. Note, the heat maps were turned 90 degrees to show transcripts as columns and  
391 mer sets as rows.

392 The number of transcripts in a group and the number of mers in a set varied substantially  
393 for both organisms. Specifically, in the zebrafish, the number of transcripts in a group  
394 ranged from 1 to 59 (of the 230) (**Fig 5**), and in the mouse, the number of transcripts by  
395 group ranged from 1 to 124 (of the total of 333) (**Fig 6**). Hence, some transcripts are very  
396 similar to one another in terms of unique mers, while others are distinctly different –  
397 there was no uniformity (i.e., equal number of mers distributed to equal number of  
398 transcripts).

399 The number of unique mers in a set ranged from 2 to 876 (of a total of 2245) in the  
400 zebrafish (**Fig 5**) and from 40 to 1407 (of a total of 5117) in the mouse (**Fig 6**). Hence,  
401 some groups of mers are found in the same transcripts while others are found in different  
402 ones. Similar to the situation with the transcripts, the relationship among the mers was  
403 not straightforward– there appears to be a pattern.

404 There are unifying features visible in the heatmaps. For example, all transcript groups in  
405 the zebrafish contained relatively similar counts of mers within the mer sets 5 as well as  
406 19 (**Fig 5**). Similarly, in the mouse, all transcript groups had similar counts of mers  
407 within the mer set 2 (**Fig 6**). Hence, despite similarities and differences of the collapsed  
408 data, there are common sets of mers found within all transcripts.

409 Zebrafish heatmap: In terms of differences, groups J and N are dissimilar from the other  
 410 transcript groups (**Fig 5**) and each group consists of a single transcript. Group J  
 411 represents the transcript *si\_ch211-69b7.6*, whose function is currently not known, and

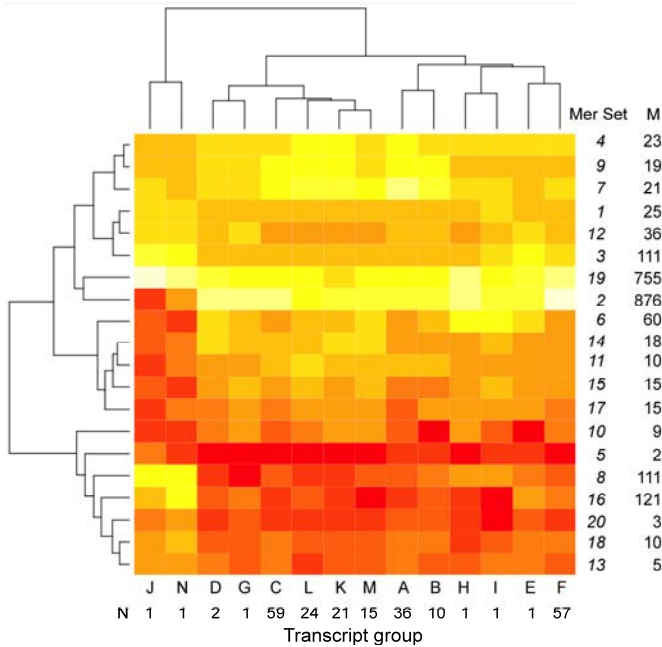

412  
 413 **Fig 5. Heatmap of transcript groups and mer sets for the zebrafish. M, count of**  
 414 **mers in group; N, count of transcripts in group. White, high count; yellow-orange,**  
 415 **median count; red, low count.**

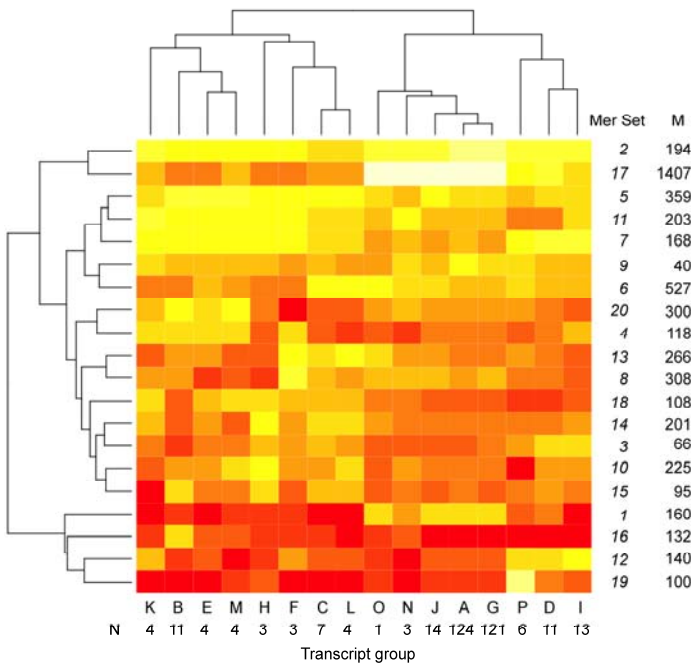

416  
 417 **Fig 6. Heatmap of Transcript groups and mer sets for the mouse. M, count of mers**  
 418 **in group; N, count of transcripts in group. White, high count; yellow-orange,**  
 419 **median count; red, low count.**



420

421

422 Group N represents the transcript *Psd2* (Pleckstrin and Sec7 domain containing 2), which  
423 is involved in regulating vesicle biogenesis in intracellular trafficking. The groups  
424 differed from the other groups in terms of the counts of mer sets 2, 3 and 8, which contain  
425 876, 111, and 111 mers, respectively.

426 There appears to be significant differences between transcript group D, G, C, L, K and M,  
427 which consist of 122 transcripts (of the 230 possible) and group A, B, H, I, E and F,  
428 which consist of 106 transcripts (**Fig 5**). These groups are distinct due to subtle  
429 differences in mer set 10, which consists of 9 mers and mer set 6, which consists of 60  
430 mers.

431 Mouse heatmap: The heatmap of the mouse shows similar variation in the number of  
432 transcripts by group and mer set (**Fig 6**). Transcript group K, B, E, M, H, F, C and L,  
433 which represent 40 transcripts (of a possible 333) is different from group O, N, J, A, G, P,  
434 D, and I (293 of possible 333 transcripts). The mer set responsible for this difference is  
435 mer set 17, which contains 1407 mers. Group O, N, J, A, G, P, D, and I have a higher  
436 relative counts than group K, B, E, M, H, F, C and L. Interestingly, the 40 transcripts in  
437 group K, B, E, M, H, F, C and L are annotated as either zinc finger proteins or predicted  
438 coding genes – and not one of the transcripts encode a protein with known function.

439 Taken together, there appears to be underlying patterns in the occurrence of unique mers  
440 in transcripts of the OP and these patterns are specific to certain groups of transcripts.

441 In the zebrafish, most (192) of the known functional gene transcripts are dispersed into  
442 many groups N, C, L, K, M, A, B, H, I and F, which represent 83% of the OP (**Fig 5**). In  
443 the mouse, most (245) of the known functional gene transcripts are found in groups A  
444 and G, which represent 74% of the OP (**Fig 6**).

#### 445 **Density of multiple mers by transcript and organism**

446 We examined the number of ‘unique’ mers by transcript length since longer transcripts  
447 might have more mers (Online Resource 15). Indeed, this was found true for the  
448 zebrafish -- there were more ‘unique’ mers with increasing transcript length (Pearson  
449 correlation coefficient,  $r=0.55$ ,  $P<0.001$ ). However, this relationship did not hold for the  
450 mouse (and we will show why below).

451 The averaged ( $\pm$  stdev) density of multiple mers for the zebrafish was  $0.14 \pm 0.18$   
452 mers/nt ( $n=230$ ) and for the mouse was  $0.40 \pm 0.67$  mers/nt ( $n=333$ ). That is, there are 14  
453 unique mers for every 100 nucleotides in the transcripts of the zebrafish and 40 mers for  
454 every 100 nucleotides in the transcripts of the mouse. Note the high standard deviations  
455 indicating a wide variation in values.

456 The highest and lowest densities of unique mers also differed between organisms. In the  
457 zebrafish, the highest density was  $\sim 1.0$  mers/nt for *Pimr* gene transcripts, which  
458 corresponds to clusters B and H (**Fig 5**), and the lowest density was  $\sim 0.04$  mers/nt for  
459 transcripts found in cluster A. We plotted the relationship between multiple mers and  
460 transcript length to find that the *Pimr* gene transcripts are distinctly different (red dots)  
461 from those in the rest of the transcripts in the OP (black dots) (**Fig 7A**). The *Pimr* genes  
462 encode proto-oncogene serine/threonine-protein kinases involved in regulating the cell

463 cycle. The remaining transcripts have a linear relationship between multiple mers and  
464 transcript length ( $y=0.1x$ ;  $R^2=0.91$ ; with  $x$  is transcript length and  $y$  is multiple mers).

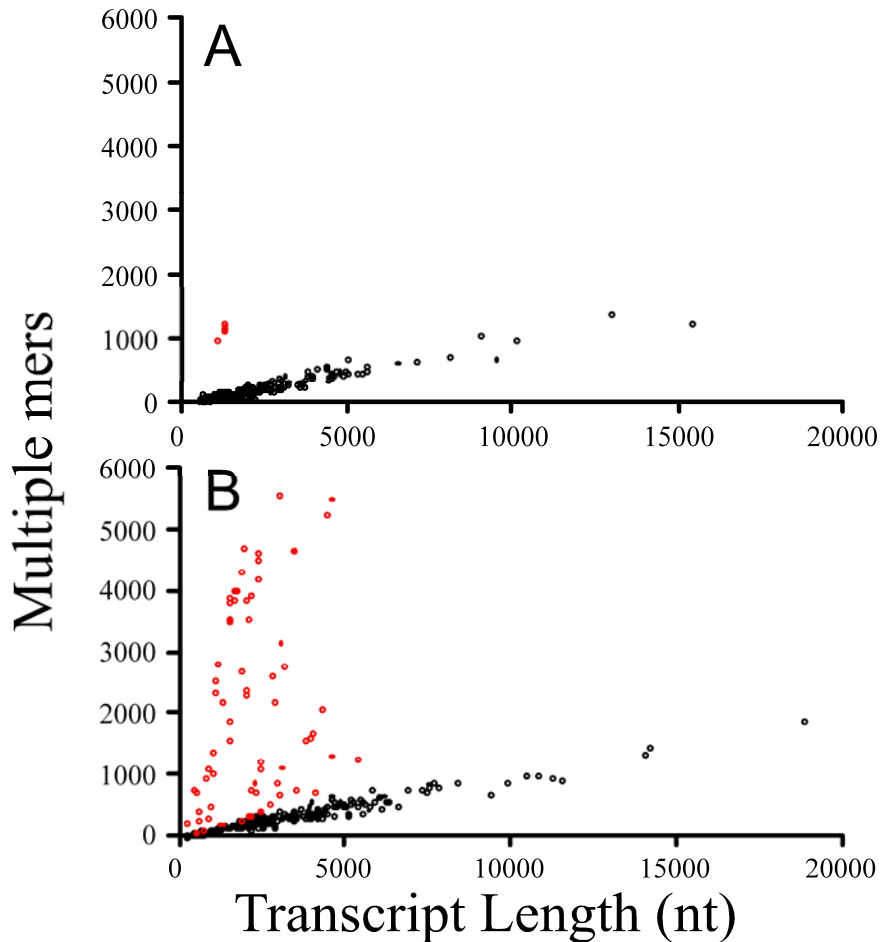

465 **Fig 7. Number of multiple unique mers in transcripts versus transcript length. A,**  
466 **zebrafish; B, mouse; Red, deviant transcripts. Red dots in the zebrafish correspond**  
467 **to *Pimr* transcripts; Red dots in the mouse represent 47 transcripts (see text).**  
468

469

470 In the mouse, the highest density was  $\sim 2.6$  mers/nt for annotated transcripts that do not  
471 have a canonical name (e.g., Gm14410, Gm14305, Gm14434, Gm2026, Gm11007,  
472 Gm2007, Gm4631) and were associated with Cluster B (Fig 6) and the lowest density  
473 was  $\sim 0.04$  mers/nt in transcripts associated with cluster A. A plot of the multiple mers by  
474 transcript length for the mouse revealed significant differences for a subset of the  
475 transcripts (red dots) when compared to the rest (black dots) (Fig 7B). The red dots  
476 represent 47 annotated gene transcripts, many that do not have a canonical name and  
477 includes those with the highest mer densities per transcript (mentioned above). The red  
478 dots also include 25 transcripts annotated as zinc finger proteins, 3 Rik transcripts, 1  
479 unprocessed pseudogene, 1 Fam containing transcript, and 10 functional gene transcripts.  
480 The remaining transcripts have a linear relationship between multiple mers and transcript  
481 length ( $y=0.1x$ ;  $R^2=0.95$ ; with  $x$  is transcript length and  $y$  is multiple mers). Hence the  
482 reason for the poor correlation between multiple mers and transcript length in the mouse

483 data (noted above) was due to 47 transcripts that deviated from the other 286 transcripts  
484 in terms of their mer density.

485 We used RNAREg2 to determine if there are any unique molecular features in the 10  
486 functional gene transcripts: *Bpifc*, *Ifitm7*, *Ms4a4c*, *Platr25*, *Rex2*, *Spag7*, *Styk1*, *Sva*,  
487 *Tmem239*, *Tnfrsf9*. We specifically looked at the relationship between the unique mers in  
488 the transcripts and the tab-delimited output files from RegRNA2 (Online Resource 15).

489 While all of the transcripts have ‘ncRNA hybridization regions’ that matched the unique  
490 mers, no patterns could be found in the AU-rich elements, K-boxes, UNR boxes,  
491 untranslated region motifs, long stem loop structures or transcriptional regulatory motifs  
492 among the 10 functional genes. Therefore, we concluded that the gene transcripts contain  
493 putative ncRNA hybridization regions – but we have no supporting evidence that these  
494 regions are actually used by the transcriptional regulation.

495 We rationalized that the transcripts with high mer densities might act as molecular  
496 sponges to RBPs and ncRNAs and thus alter their availability in the intracellular pools.  
497 If so, one would expect the profiles (i.e., transcript abundance by postmortem time) of  
498 transcripts with high densities and those transcripts affected by them to be highly  
499 correlated. Moreover, they should share similar unique mers that serve as putative  
500 binding sites. Principal component analysis was used to find patterns among transcripts  
501 with high mer densities using the correlations of their transcript abundance profiles to the  
502 rest of the profiles in the OP of the mouse brain. Network analysis was used to find  
503 shared mer binding sites.

504 The two axes of the ordination plot accounted for 96% of the variability (**Fig 8A**). There  
505 appears to be three distinct areas in the ordination plot. One location is occupied by  
506 Gm14399, the other location is populated by a group of 8 gene transcript and the third  
507 location is occupied by Gm14409. The correlations among the transcript profiles differed  
508 by high density transcripts suggesting that certain groups might regulate different sets of  
509 transcripts.

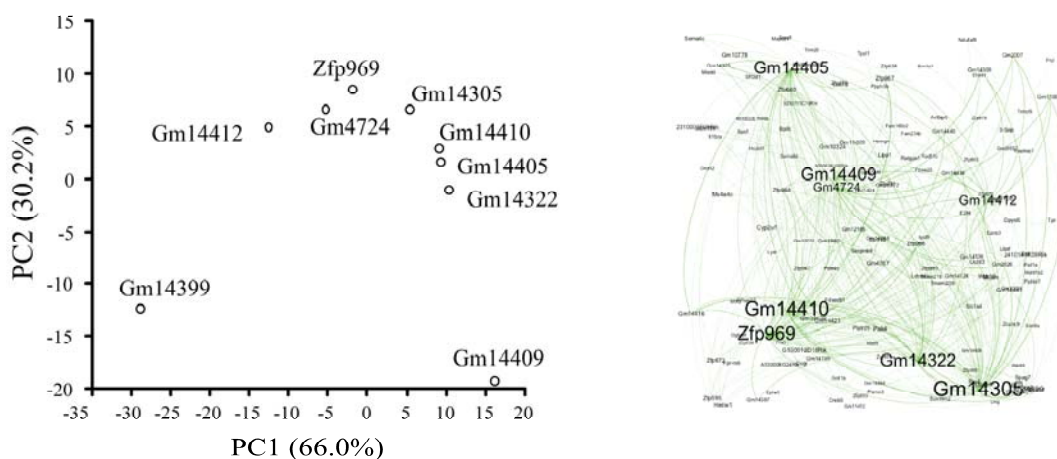

510  
511 **Fig 8. Ordination plot of transcripts with high mer densities (left) and network of**  
512 **transcripts with shared mers (right). The ordination was based on the correlations**  
513 **among mouse brain transcript profiles. The network was based on the number of**  
514 **shared mers in subset of the transcript profiles with high  $R^2$  (>0.95) to the**  
515 **transcripts with high mer densities. The network shows that the transcripts with**

516 **high mer densities (i.e., molecular sponges) shared mers with many other**  
 517 **transcripts.**

518 To investigate the connections within the networks, we took a subset of the transcripts  
 519 with high  $R^2$ s ( $>0.95$ ), and counted the number of shared mers. A network plot revealed  
 520 that transcripts with high mer densities are connected to many different transcripts and  
 521 that some shared similar mers. For example, Gm14305 shared mers with Gm11007,  
 522 Gm2007, Gm14308 and *Hhmt1* as well as many other transcripts (**Fig 8B**). This finding  
 523 suggests that the number of possible transcripts (and pathways) that are affected by  
 524 molecular sponges appears to be quite vast.

525 Taken together, the results suggest that mer density is not the same in all OP transcripts  
 526 and differs by organism and that transcripts with high density of mers have similar  
 527 transcript profiles to the transcripts with lower density of mers some of which they share.  
 528 The implications of this finding is that transcripts with high mer densities have the  
 529 potential to act as molecular sponges to other transcripts and thus regulate them post-  
 530 transcriptionally.

531 **Multiple mer density by region (5'UTR, ORFs, 3'UTR)**

532 To investigate the density of unique mers by region, up to ten transcripts from each  
 533 cluster (**Fig 5 and Fig 6**) were compared to determine if there are significant differences  
 534 in mer density by region (Online Resource 16). Note that not all transcripts had 5'UTR  
 535 and/or 3'UTR regions and some lacked ORFs (e.g., ncRNA).

536 In the zebrafish, for the transcripts having all three regions, the 3'UTR region had  
 537 significantly more mers/nt than the other two regions (**Table 5**, Paired two-tailed T-tests,  
 538  $P < 0.0001$ ). Transcripts lacking 5'UTR, 3'UTR, or ORFs have low densities (i.e.,  $\sim 0.1$   
 539 mers/nt), indicating regional effects.

540 **Table 5. Number of unique mers by nucleotide (transcript length), region and**  
 541 **organism. Two-way paired t-test across rows: a,b,  $P < 0.0001$ ; c,d  $P < 0.01$ .**

| Organism  | Regions           | Number of transcripts | 5'UTR            | ORF              | 3'UTR            | Non-coding     |
|-----------|-------------------|-----------------------|------------------|------------------|------------------|----------------|
| Zebrafish | 5'UTR, ORF, 3'UTR | 70                    | $0.2 \pm 0.26^a$ | $0.2 \pm 0.28^a$ | $0.3 \pm 0.35^b$ | -              |
|           | ORF, 3'UTR        | 4                     | -                | $0.1 \pm 0.01$   | $0.1 \pm 0.03$   | -              |
|           | 5'UTR, ORF        | 1                     | 0.1              | 0.1              | -                | -              |
|           | ORF               | 3                     | -                | $0.1 \pm 0.03$   | -                | -              |
|           | Non-coding        | 1                     | -                | -                | -                | 0.1            |
| Mouse     | 5'UTR, ORF, 3'UTR | 65                    | $0.4 \pm 0.60^a$ | $0.6 \pm 0.70^b$ | $0.5 \pm 0.80$   | -              |
|           | ORF, 3'UTR        | 2                     | -                | $0.1 \pm 0.00$   | $0.1 \pm 0.00$   | -              |
|           | 5'UTR, ORF        | 16                    | $1.4 \pm 0.80^c$ | $2.0 \pm 0.70^d$ | -                | -              |
|           | ORF               | 11                    | -                | $2.3 \pm 0.50$   | -                | -              |
|           | Non-coding        | 10                    | -                | -                | -                | $0.4 \pm 0.50$ |

542  
 543  
 544

545 In contrast, the highest unique mer densities in the mouse were found in the ORFs of  
 546 transcripts – not the 3’UTR region as in the zebrafish (Table 5). In transcripts having all  
 547 three regions, the ORFs had significantly higher densities than the 5’UTR (Paired two-  
 548 tailed T-test,  $P < 0.0001$ ). In gene transcripts that have both 5’UTR and ORFs (no  
 549 3’UTR), or those having neither 5’UTR nor 3’UTR regions (i.e., ORF only) had twice the  
 550 mer densities than transcripts having all three regions. Moreover, higher mer densities  
 551 were found in the ORFs than the 5’UTR (Table 5, Paired two-tailed T-tests,  $P < 0.01$ ).  
 552 One possible reason for these differences is that the 16 samples having no 3’UTR and the  
 553 11 samples lacking untranslated regions (i.e., they were all ORFs) consist of genes  
 554 annotated as ‘predicted coding gene’ or ‘zinc finger protein gene’. Hence, gene function  
 555 might play a role in these differences.

556 In summary, the results show distinct differences in mer densities by organism and  
 557 region. In the zebrafish, the highest mer densities were found in the 3’UTR while the  
 558 highest densities in the mouse were found in the ORFs.

### 559 **Known motifs**

560 The following motifs are associated with increased mRNA stability or gene expression:  
 561 the *Hud* binding site, YUNNYUY [21]; the *Rbfox* binding site, UGCAUG [10]; and  
 562 UAUUUUAU, GAGAAAA, AGAGAAA, UUUGCAC, AUGUGAA, UUGCACA,  
 563 GGGGAAGA [22]. We screened these motifs against the unique mers to identify  
 564 transcripts in the OP that might have increased stability or gene expression due to these  
 565 motifs.

566 Three hundred and fourteen of the 333 OP transcripts (94%) in the mouse and 189 of the  
 567 230 transcripts (82%) in the zebrafish contained one or more of the known binding motifs  
 568 associated with increased mRNA stability or gene expression (Table 6). Most of the  
 569 transcripts in the OP of the mouse and zebrafish had at least two different motifs (Fig 9).  
 570 The number of previously reported motifs represents a small fraction of the total number  
 571 of unique mers found in our study (180 of the 5117 unique mouse mers (3.5%) and 54 of  
 572 the 2245 zebrafish mers (2.4%)). Hence, our study identified 4937 and 2191 putatively  
 573 new motifs in transcripts of the OP of the mouse and zebrafish, respectively. It remains to  
 574 be determined if these new motifs are functional or not.

575 **Table 6. Number of transcripts by known protein binding site and organism. *Hud***  
 576 **binding site, YUNNYUY [21]; *Rbfox* binding site, UGCAUG [10]; and UAUUUUAU,**  
 577 **GAGAAAA, AGAGAAA, UUUGCAC, AUGUGAA, UUGCACA, GGGGAAGA [22].**

| Organism  | <i>n</i> transcripts | Protein binding sites |              |                 |           |
|-----------|----------------------|-----------------------|--------------|-----------------|-----------|
|           |                      | <i>Hud</i>            | <i>Rbfox</i> | Jacobsen et al. | All three |
| Mouse     | 333                  | 287                   | 126          | 258             | 314       |
| Zebrafish | 230                  | 185                   | 0            | 106             | 189       |

578

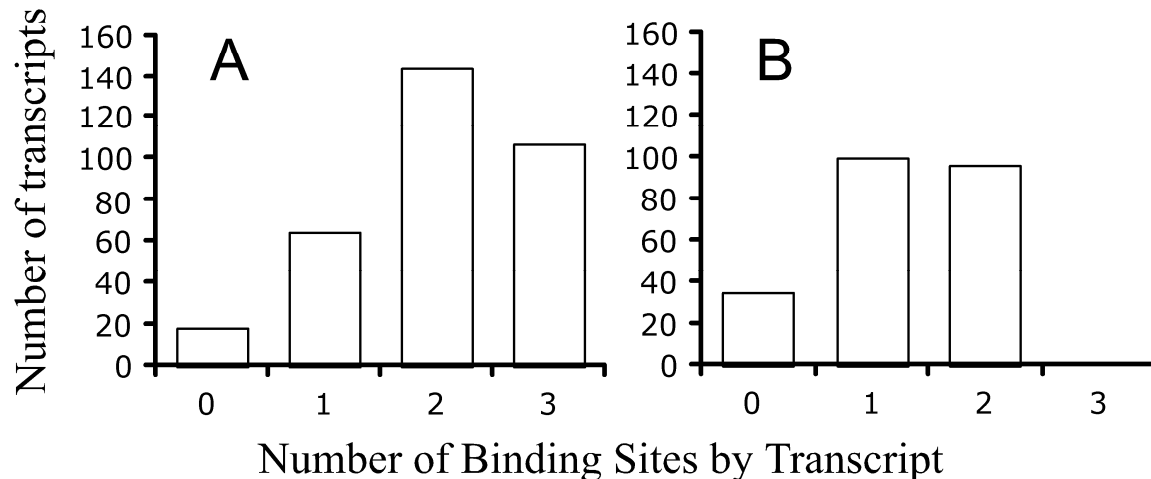

579

580

581

582

583

584

585

**Fig 9. Number of known binding sites per transcripts for the mouse (A) and zebrafish (B). Total number of transcripts for the mouse,  $n=333$  and for the zebrafish,  $n=230$ . The following binding sites were examined: *Hud* binding site, YUNNYUY [21]; *Rbfox* binding site, UGCAUG [10]; and UAUUUAU, GAGAAA, AGAGAAA, UUUGCAC, AUGUGAA, UUGCACA, GGAAGA [22]. Note: the zebrafish did not have *Rbfox* binding sites.**

586

587

## DISCUSSION

588

589

590

591

592

593

594

595

The motivation for our study was driven by curiosity into possible mechanisms responsible for the increase in transcript abundances with postmortem time, which have now been reported to occur in the zebrafish, mouse, and humans [3, 4]. There is a need to understand regulatory features and how they influence transcriptional dynamics in order to comprehend the response of biological systems to stress. Yet, to our knowledge, no study has investigated possible reasons for increases in transcript abundance after organismal death. Such information is needed to provide baseline data for gene expression studies involving stressful conditions such as disease, starvation, and cancer.

596

### Unique mers identified in the OP

597

598

599

600

Our initial hypothesis was that among multiple reasons, there must be a signal, i.e., a nucleotide sequence that is responsible for postmortem activation of certain transcripts. Instead, we find sets of 'unique' mers in different groups of transcripts, with most sets consisting of ten to hundreds of different mers -- not just one or two.

601

602

603

604

605

606

607

608

The total number of unique mers in the OP was relatively small compared to all possible mers, ~1.5% of the total combinations of 3- to 9- mers in the mouse and ~0.6% in the zebrafish. These small percentages are presumably due to the arbitrary criterion used to identify unique mers. The reason the criterion was set to 5 times the standard deviation of the average count of the mer in the CP was to ensure that the identified mers were not due to random chance (i.e., false positives, FPs). Our results indicate that chance of a random mer having a count exceeding the criterion was relatively rare -- but FPs did occur and their occurrence increased with mer length (Fig 2D).



609 The fact that several mers identified in our study have been previously reported to be  
610 involved with increased gene expression and/or mRNA stability (e.g., *Hud*, *Rbfox*, *ARE*  
611 binding sites; [10,21,23]) is consistent with the idea that our experimental design was  
612 effective at identifying ‘unique’ mers in the postmortem transcriptome of two different  
613 organisms.

#### 614 **Unique mers by transcript, region, and organism**

615 The number of unique mers in each transcript of the OP varied considerably. Some  
616 transcripts have a disproportionately high number of mers, while others have much lower  
617 numbers. Interestingly, in the mouse, several of the transcripts with high multiple mer  
618 densities have an ORF with no known function. Other transcripts have known functions,  
619 including: *Bpifc*, which is involved in innate immune response; *Fam160b2*, which is  
620 involved in phosphorylation of *Hsp70* [24]; *Ifitm7*, which is involved in regulation of cell  
621 proliferation and immune response [25]; *Ms4a4c*, which regulates receptor signaling and  
622 recycling [26]; *Spag7*, which is involved in antiviral and inflammatory response [27, 28,  
623 29]; *Styk1*, which is associated with cancer progression and promotes the Warburg effect  
624 through signaling of the PI3K/AKT pathway [30, 31, 32]; and *Tnfrsf9*, which is involved  
625 in positive regulation of immune system functions and leukocyte activation [33]. In the  
626 zebrafish, a disproportionately high number of mers occurred in the *Pimr* gene  
627 transcripts, which are involved in cell cycling. These gene transcripts have common  
628 functions: cell survival, proliferation, cycling, stress compensation, and/or defense. It is  
629 enticing to speculate that the other transcripts (i.e., those with no known functions but  
630 with high mer densities) might also be involved in these functions.

631 The density of multiple unique mers was higher in the ORFs than the 3’UTR in the  
632 mouse -- but quite the opposite was true in the zebrafish (Table 5). That is, the zebrafish  
633 had a higher mer density in the 3’UTR than the other regions. In general, the 3’ UTR is  
634 involved in subcellular localization and mRNA stability, while the 5’ UTR play roles in  
635 translational control [34]. Motifs within the UTR regions are thought to control functions  
636 by interacting with RBPs [34]. Yet, the highest density of mers ( $2.3 \pm 0.50$  mers/nt) was  
637 in 11 transcripts that lacked UTRs (i.e., they were all ORFs). These findings are aligned  
638 with the notion that binding sites can exist all along the transcripts and not necessarily  
639 restricted to the UTRs [35]. It is possible that these 11 transcripts act as large “molecular  
640 sponges” in stressful conditions, providing an additional layer of complexity to post-  
641 transcriptional regulation (which we discuss below).

642 While the two organisms share 47 unique mers, there were significant differences in  
643 terms of their mer counts, the multiple mer densities by region, and the number of mers  
644 per transcript by organism. This finding suggests that post-transcriptional regulation  
645 varies significantly by organism – but this is not surprising since our original study [4]  
646 sampled mRNAs in whole organisms in the case of the zebrafish and the organ/tissues of  
647 the brains and livers in the case of the mouse. The samples are not comparable and we  
648 would not expect post-transcriptional regulation to be the same in different organisms or  
649 organ/tissues.

#### 650 **Unique Mers and known binding sites**

651 One set of unique mers with the sequence YUNNYUY apparently binds *Hud* proteins  
652 (Table 6). *Hud* proteins stabilize mRNA by binding to AU-rich instability elements



653 (AREs) in the 3'UTR and they target transcripts involved in neuronal differentiation,  
654 protein phosphatase regulation, ubiquitin ligation, and the transport, processing and  
655 translation of mRNAs [21]. Interestingly, *Hud* proteins not only target their own mRNA  
656 but those of other RBPs, which suggests that it forms a network of post-transcriptional  
657 regulators [21]. In the mouse, data from our previous study [4] showed that *Hud*  
658 transcript abundance increased upon organismal death to reach maxima at 12 to 48 h  
659 postmortem (**Fig 10A**). In the zebrafish, the *Hud* transcript abundance was about the  
660 same as the live controls for up to 4 h postmortem and then it declined and abruptly  
661 increased after 48 h (**Fig 10B**). These findings are aligned with the notion that *Hud* genes  
662 are involved in stabilizing some of the mRNAs in our previous study.

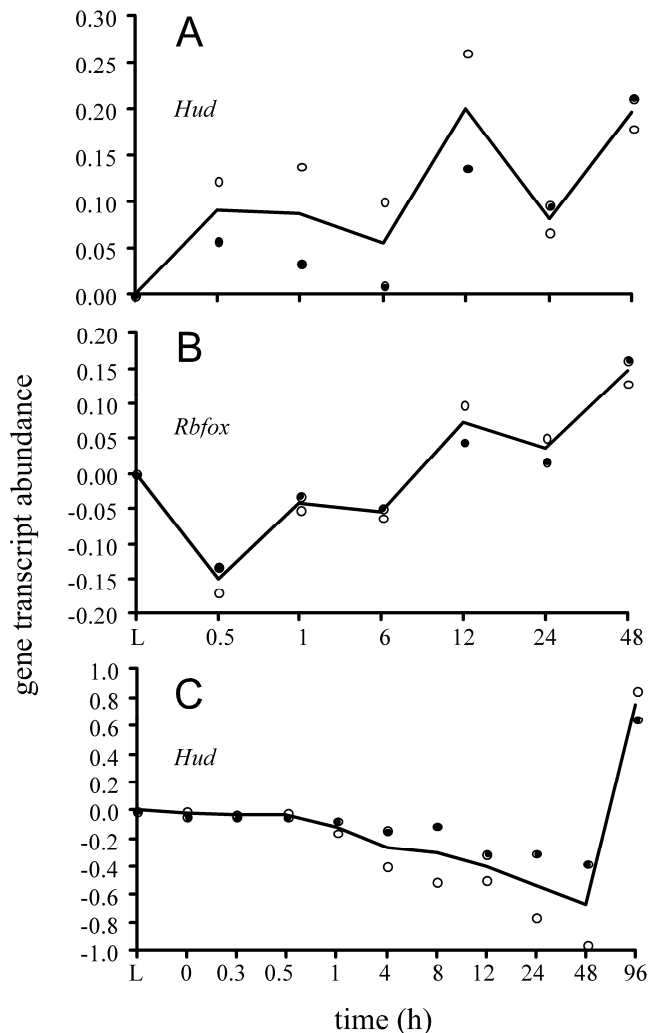

663  
664 **Fig 10. Gene transcript abundances measured by a calibrated microarray [41,42]**  
665 **(log transformed) by postmortem time. Abundances were normalized to flash**  
666 **frozen live controls (L). Black line, average. (A) *Hud* transcript in mouse; black**  
667 **dots, averaged abundance measured by probe A\_55\_P1990309 ( $n=3$  replicates for**  
668 **each dot except 48 h where  $n=2$  replicates); white dots, average abundance**  
669 **measured by probe A\_55\_P1990314; (B) *Rbfox* transcript in mouse; black dots,**  
670 **average abundance measured by probe A\_55\_P195339 ( $n=3$  replicates for each dot**  
671 **except last where  $n=2$  replicates); white dots, average abundance of probe**

672 **A\_55\_P1953400; (C) *Hud* transcript in zebrafish; black dots, average abundance of**  
673 **probe A\_15\_P119510 ( $n=2$  replicates for each dot); white dots, average abundance**  
674 **of probe A\_15\_P120793. Data are from ref. [4].**

675 Another unique mer with the sequence UGCAUG has previously been reported to serve  
676 as the binding site for *Rbfox* proteins that regulate splicing networks, mRNA stability and  
677 miRNA biogenesis [10]. Apparently, the binding to transcripts inhibits processing of the  
678 pri-microRNAs to pre-microRNAs, reduces expression of the mature miRNAs, and  
679 increases expression of targets normally downregulated by miRNAs [10]. A previous  
680 study has shown that the abundance of transcripts with UGCAUG motifs in the 3'UTR  
681 positively correlates with *Rbfox* expression, and that knockdown of *Rbfox* decreases  
682 transcript abundances [36]. These findings support the hypothesis that *Rbfox* enhances  
683 mRNA stability as well as gene expression. In our study, a little more than a third of the  
684 transcripts in the OP of the mouse have this binding site, but none were found in the OP  
685 of the zebrafish (Table 6). In the mouse, data from our previous study [4] showed that  
686 *Rbfox* transcript abundance increased after 30 min postmortem to reach a maximum at 48  
687 h (Fig 10C). These findings suggest that *Rbfox* proteins were interacting with some of  
688 the mouse mRNAs in our previous study.

689 The following 7 unique mers found in the OP have recently been reported as putative  
690 binding sites: UAUUUUAU, GAGAAAA, AGAGAAA, UUUGCAC, AUGUGAA,  
691 UUGCACA, GGGAAGA [34]. These sites have been correlated with increased gene  
692 expression in HeLa cells transfected with miRNAs. The UAUUUUAU binding site is  
693 reported to be an ARE that signals rapid degradation or increased stability of mRNAs in  
694 response to stress [36]. The Jacobsen et al. [34] study showed that ARE binding sites and  
695 miRNA mediated regulation are interlinked, which is aligned with a similar study in  
696 *Drosophila* cells [37]. While the significance and mechanistic insights of the 6 other  
697 putative binding sites were not discussed in the Jacobsen et al. study [34], at least one of  
698 the seven binding sites was found in 258 of the 333 transcripts of the mouse and 106 of  
699 the 230 of the zebrafish, indicating that miRNAs might be involved in “regulating” the  
700 postmortem transcriptome (Table 6).

### 701 **Post-transcriptional regulation of the postmortem transcriptome**

702 Several possible scenarios could be working in spatially and temporally combination to  
703 increase transcript stability and/or increase transcript abundance in the postmortem  
704 transcriptome. These scenarios are based, in part, on the “Competing endogenous RNA  
705 hypothesis”, which is provided at the end of the Discussion. However, without  
706 experimental evidence, we caution that these scenarios are speculative at best.

707 One scenario is transcript stability is increased in the OP because they have more unique  
708 mers than the CP and RBPs bind to regulatory sites of transcripts of the OP blocking the  
709 binding of miRNAs, which are linked to degradation pathways. As a consequence,  
710 transcript stability is increased because the transcripts accumulate in the cells over time.

711 A second scenario is postmortem genes are upregulated due to miRNA inhibition. Take,  
712 for example, transcripts regulated by p53 tumor suppressor that increase in abundance in  
713 response to miR-21 inhibition [38].

714 A third scenario is that some of the transcripts containing high multiple densities of mers  
715 act as molecular sponges that bind miRNAs and/or RBPs and therefore affect post-  
716 transcriptional regulation *in trans*. An example of this in our study was the 11 gene  
717 transcripts in the mouse with unknown functions and the *Pimr* transcripts in the zebrafish  
718 that had high densities in terms of mers per nucleotide (~2.4 mer/nt and ~1.0 mer/nt,  
719 respectively). Such high densities indicate that they contained many unique binding sites  
720 to sponge RBPs and/or ncRNAs. According to the data from our previous paper [4], all  
721 the transcripts with high mer densities in the mouse increase in abundance right after  
722 death (0.5 h) and continued to increase, reaching a maximum abundance at 12 h, and then  
723 slowly decline (Fig 11A). In the zebrafish, the *Pimr* gene transcripts increased slightly  
724 after death (relative to live controls) and abruptly increased after 12 h to maximize at 24 h  
725 (Fig 11B). One-way to interpret these phenomena are that the transcripts are depleting  
726 the miRNA and/or RBP pools. In response to the decrease, a select group of genes  
727 involved in survival and stress compensation were passively transcribed, which accounts  
728 for the increases in transcript abundances in our original study.

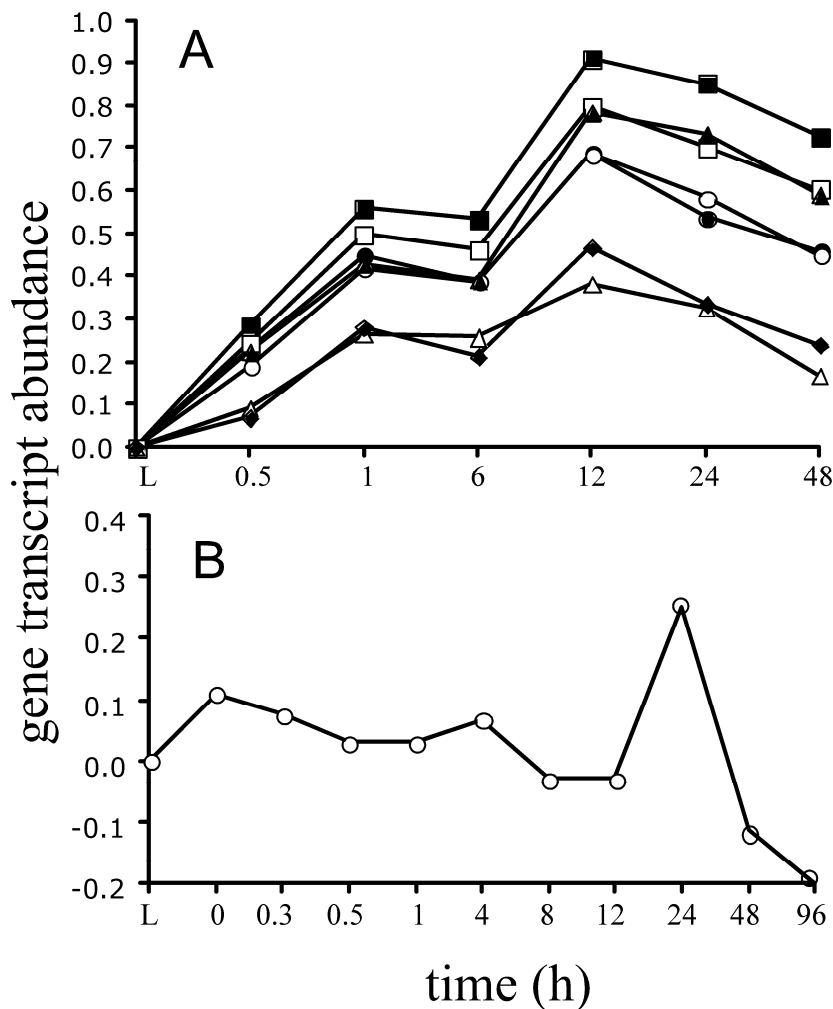

729 Fig 11. Gene transcript abundances measured by a calibrated microarray [41,42]  
730 (log transformed) by postmortem time. Abundances were normalized to flash frozen  
731 live controls (L). Black line, average. (A) Mouse: Open circle, represents Gm11007,  
732 Gm2007, Gm4631, Gm14434, Gm2026, Gm14305, Gm14399, Gm14325, Zfp969,  
733

734 **Gm4724, Gm14326 transcripts; closed circle, Zfp967, Zfp969, Zfp968; open square,**  
735 **Gm14410; closed square, Gm14305; open triangle, Gm14322; closed triangle,**  
736 **Gm14308; closed diamond, Gm14412. All points are the average of 3 replicates per**  
737 **sample time except the 48 h, which is the average of 2 replicates. (B) Zebrafish:**  
738 ***Pimr* transcript. Each point in the zebrafish represents the average of two**  
739 **individuals per sample time. Data are from ref. [4].**

740 Further support for this scenario comes from the fact that most of the functional genes  
741 involved in survival and stress compensation were found in two clusters in the mouse:  
742 Groups A and G (59% of the OP) with low mer densities of  $0.11 \pm 0.12$  mers/nt and  $0.11$   
743  $\pm 0.05$  mers/nt, respectively (**Fig 6**). In the zebrafish, most of the known functional gene  
744 transcripts are dispersed into groups A, C, F, K L, M, and N (93% of the OP) (**Fig 5**),  
745 which have low mer densities (e.g.,  $0.10 \pm 0.02$  mers/nt). It is these genes that might  
746 have been passively upregulated due to lack of miRNA and RBPs to prevent them. This  
747 scenario makes sense for an evolutionary perspective because post-transcriptional  
748 regulation facilitates fast changes in response to stress so that cells can adapt to  
749 environmental change.

#### 750 **Alternative splicing sites might differ under stress**

751 We assumed that the mRNA transcripts downloaded from NCBI represent dominant  
752 isoforms one would expect to find in nature. However, a recent study [3] suggests that  
753 stress increases the production of different isoforms through alternative splicing. In other  
754 words, the composition of the transcripts might change in stressful conditions (i.e.,  
755 different isoforms are produced). Our analysis did not account for this, however  
756 repeating our experiment using next-generation-sequencing methods might indeed  
757 provide additional insight into post-transcriptional regulation in postmortem gene  
758 expression, which is the focus of our future research.

#### 759 **Competing endogenous RNA hypothesis**

760 According to the ‘competing endogenous RNA’ hypothesis, all types of RNA transcripts  
761 communicate through regulatory-binding sites and it is these interactions that regulate  
762 gene expression [39]. The binding of miRNAs to sites represses translation and  
763 destabilizes the mRNA, thus having an overall negative regulatory role on gene  
764 expression. However, in the case when there is a limited pool of miRNAs to bind the  
765 sites or an overabundance of binding sites in transcripts, there is competition between  
766 targets to sequester miRNA. Thus, a surplus of binding sites dilutes the miRNA pool and  
767 gene expression resumes passively. Pseudogenes (i.e., those resembling known genes but  
768 are nonfunctional) as well as other transcripts can dilute the miRNA pool and thereby  
769 regulate their availability, and thus have an overall positive regulatory role on gene  
770 expression.

771 Missing from the competing endogenous RNA hypothesis is the role of RBPs to compete  
772 with miRNA for regulatory binding sites. The presumed reason for this omission was at  
773 the time (i.e., 2011) there was a paucity of information supporting the idea that molecular  
774 sponges interact with proteins. However, proof exists today [22]. A recent study  
775 reanalyzed high-throughput cross-linking and immunoprecipitation experiments in  
776 Human Embryonic Kidney Cells 293 to show that RBPs and miRNA often bind to the  
777 same or overlapping regulatory binding sites. The significance of this finding is twofold:

778 (i) it suggests competition among the regulators (RBPs, miRNA, binding sites in different  
779 targets) and (ii) it suggests the relative concentrations of the RBPs and miRNAs to the  
780 regulatory binding sites might determine a transcript's fate [40].

781 A third significant finding from the same study was the introduction of 'hotspot' binding  
782 sites that have high sequence conservation, accessibility, and enrichment in AU-rich  
783 elements (AREs) (i.e., devoid of guanines) and function by favoring competition among  
784 regulators [40]. Apparently, target sites outside of hotspots have increased expression  
785 levels compared to targets sites within hotspots. Hence 'hotspots' are considered  
786 functional regulatory elements that provide an extra layer of regulation of post-  
787 transcriptional regulatory networks.

788

## 789 **SUMMARY**

790 This is the first study to investigate over-abundant mers in transcriptomic profiles after  
791 organismal death and raises interesting questions relative to post-transcriptional  
792 regulation and molecular biology.

793

794

## 795 **ETHICAL STANDARDS**

796

797 The experiments comply with the current laws of the USA.

798

799

800

## 801 **CONFLICT OF INTEREST**

802

803 The authors declare that they have no conflict of interest.

804

## 805 **LITERATURE CITED**

806

- 807 1. Harvey R, Dezi V, Pizzinga M, Willis AE (2017) Post-transcriptional control of gene  
808 expression following stress: the role of RNA-binding proteins. *Biochem Soc T*  
809 45:1007-14. <https://doi:10.1042/BST20160364> PMID: 28710288
- 810 2. Hogg JR, Collins K (2008) Structured non-coding RNAs and the RNP Renaissance.  
811 *Curr Opin Chem Biol* 12:684-9. . <https://doi:10.1016/j.cbpa.2008.09.027> PMID:  
812 18950732
- 813 3. Ferreira, PG., Muñoz-Aguirre, M., Reverter, F., Sá Godinho, C.P., Sousa, A., Amadoz,  
814 A., Sodaei, R., Hidalgo, M. R., Pervouchine, Dmitri, Carbonell-Caballero, J., Nurtdinov,  
815 R., Breschi, A., Amador, R., Oliveira, P., Çubuk, C., Curado, J., Aguet, F., Oliveira,  
816 C., Dopazo, J., Sammeth, M., Ardlie, K. G., Guigó, R (2018) The effects of death and  
817 post-mortem cold ischemia on human tissue transcriptomes. *Nat Commun* 490:2041-  
818 1723. <https://doi:10.1038/s41467-017-02772-x> PMID: 29440659

- 819 4. Pozhitkov AE, Neme R, Domazet-Loo T, Leroux BG, Soni S, Tautz D, Noble PA  
820 (2017) Tracing the dynamics of gene transcripts after organismal death. *Open Biol* 7:  
821 160267. <https://doi:10.1098/rsob.160267> PMID: 28123054
- 822 5. Dykes IM, Emanuelli C (2017) Transcriptional and post-transcriptional gene  
823 regulation by long non-coding RNA. *Genomics Proteomics Bioinformatics* 15:177-  
824 186. <https://doi:10.1016/j.gpb.2016.12.005> PMID: 28529100
- 825 6. He JH, Han ZP, Liu JM, Zhou JB, Zou MX, Lv YB, Li YG, Cao MR (2017)  
826 Overexpression of long non-coding RNA Meg3 inhibits proliferation of  
827 hepatocellular carcinoma Huh7 cells via negative modulation of miRNA-664. *J Cell*  
828 *Biochem* 118:3713-3721. <https://doi:10.1002/jcb.26018> PMID: 28374914
- 829 7. Gerstberger S, Hafner M, Tuschl T (2014) A census of human RNA-binding proteins.  
830 *Nat Rev Gene* 15:829-45. <https://doi:10.1038/nrg3813> PMID: 25365966
- 831 8. Maraia RJ, Mattijssen S, Cruz-Gallardo I, Conte MR (2017) The La and related  
832 RNA-binding proteins (LARPs): structures, functions, and evolving perspectives.  
833 *Wiley Interdiscip Rev RNA*, 8(6). <https://doi:10.1002/wrna.1430> PMID: 28782243
- 834 9. Castella S, Bernard R, Corno M, Fradin A, Larcher JC (2015) Iif3 and NF90  
835 functions in RNA biology. *Wiley Interdiscip Rev RNA*, 6:243-56.  
836 <https://doi:10.1002/wrna.1270> PMID: 25327818
- 837 10. Conboy JG. (2017) Developmental regulation of RNA processing by Rbfox proteins.  
838 *Wiley Interdiscip Rev RNA* 8(2). <https://doi:10.1002/wrna.1398> PMID: 27748060
- 839 11. Soengas MS, Hernando E (2017) TYRP1 mRNA goes fishing for miRNAs in  
840 melanoma. *Nat Cell Biol* 19:1311-1312. <https://doi:10.1038/ncb3637> PMID:  
841 29087386
- 842 12. Gilot D, Migault M, Bachelot L, Journé F, Rogiers A, Donnou-Fournet E, Mogha A,  
843 Mouchet N, Pinel-Marie ML, Mari B, Montier T, Corre S, Gautron A, Rambow F, El  
844 Hajj P, Ben Jouira R, Tartare-Deckert S, Marine JC, Felden B, Ghanem G, Galibert  
845 MD (2017) A non-coding function of TYRP1 mRNA promotes melanoma growth.  
846 *Nat Cell Biol* 19:1348-1357. <https://doi:10.1038/ncb3623> PMID: 28991221
- 847 13. Liu J, Liu T, Wang X, He A (2017) Circles reshaping the RNA world: from waste to  
848 treasure. *Mol Cancer* 16:58. <https://doi:10.1186/s12943-017-0630-y> PMID: 28279183
- 849 14. Łabno A, Tomecki R, Dziembowski A (2016) Cytoplasmic RNA decay pathways -  
850 Enzymes and mechanisms. *Biochim Biophys Acta* 1863:3125-3147.  
851 <https://doi:10.1016/j.bbamcr.2016.09.023> PMID: 27713097
- 852 15. Wilusz JE, Sunwoo H, Spector DL (2009) Long noncoding RNAs: functional  
853 surprises from the RNA world. *Genes Dev* 23:1494-504.  
854 <https://doi:10.1101/gad.1800909> PMID: 19571179
- 855 16. Eddy SR (2001) Non-coding RNA genes and the modern RNA world. *Nat Rev Genet*  
856 2:919-29. <https://doi:10.1038/35103511> PMID: 11733745
- 857 17. Jeffrey HJ. (1990) Chaos game representation of gene structure. *Nucleic Acids Res*  
858 18:2163-70. PMID: 2336393
- 859 18. Noble PA, Citek RW, Ogunseitan OA (1998) Tetranucleotide frequencies in  
860 microbial genomes. *Electrophoresis* 19:528-35. <https://doi:10.1002/elps.1150190412>  
861 PMID: 9588798
- 862 19. Almeida JS, Carriço JA, Marezek A, Noble PA, Fletcher M (2001) Analysis of  
863 genomic sequences by Chaos Game Representation. *Bioinformatics* 17:429-37.  
864 PMID: 11331237



- 865 20. Chang TH, Huang HY, Hsu JB, Weng SL, Horng JT, Huang HD (2013) An enhanced  
866 computational platform for investigating the roles of regulatory RNA and for  
867 identifying functional RNA motifs. *BMC Bioinformatics Suppl* 2:S4.  
868 <https://doi:10.1186/1471-2105-14-S2-S4> PMID: 23369107
- 869 21. Bolognani F, Contente-Cuomo T, Perrone-Bizzozero NI (2010) Novel recognition  
870 motifs and biological functions of the RNA-binding protein HuD revealed by  
871 genome-wide identification of its targets. *Nucleic Acids Res* 38:117-30.  
872 <https://doi:10.1093/nar/gkp863> PMID: 19846595
- 873 22. Jacobsen A, Wen J, Marks DS, Krogh A (2010) Signatures of RNA binding proteins  
874 globally coupled to effective microRNA target sites. *Genome Res* 20:1010-9.  
875 <https://doi:10.1101/gr.103259.109>. PMID: 20508147
- 876 23. Barreau C, Paillard L, Osborne HB. (2006) AU-rich elements and associated factors:  
877 are there unifying principles? *Nucleic Acids Res* 33:7138-50. .  
878 <https://doi:10.1093/nar/gki1012> PMID: 16391004
- 879 24. Ding CL, Xu G, Tang HL, Zhu SY, Zhao LJ, Ren H, Zhao P, Qi ZT, Wang W (2015)  
880 Anchoring of both PKA-RII $\alpha$  and 14-3-3 $\theta$  regulates retinoic acid induced 16  
881 mediated phosphorylation of heat shock protein 70. (2014) *Oncotarget* 6:15540–  
882 15550. <https://doi:10.18632/oncotarget.3702>
- 883 25. Miller LC, Jiang Z, Sang Y, Harhay GP, Lager KM (2014) Evolutionary  
884 characterization of pig interferon-inducible transmembrane gene family and member  
885 expression dynamics in tracheobronchial lymph nodes of pigs infected with swine  
886 respiratory disease viruses. *Vet Immunol Immunopathol* 159:180-91.  
887 <https://doi:10.1016/j.vetimm.2014.02.015> PMID: 24656980
- 888 26. Cruse G, Beaven MA, Music SC, Bradding P, Gilfillan AM, Metcalfe DD (2015) The  
889 CD20 homologue MS4A4 directs trafficking of KIT toward clathrin-independent  
890 endocytosis pathways and thus regulates receptor signaling and recycling. *Mol Biol*  
891 *Cell* 26:1711-27. <https://doi:10.1091/mbc.E14-07-1221> PMID: 25717186
- 892 27. Bens S, Zichner T, Stütz AM, Caliebe A, Wagener R, Hoff K, Korbel JO, von  
893 Bismarck P, Siebert R (2014) SPAG7 is a candidate gene for the periodic fever,  
894 aphthous stomatitis, pharyngitis and adenopathy (PFAPA) syndrome. *Genes Immun*  
895 15:190-4. <https://doi:10.1038/gene.2013.73> PMID: 24452265
- 896 28. Fernebro J, Francis P, Edén P, Borg A, Panagopoulos I, Mertens F, Vallon-  
897 Christersson J, Akerman M, Rydholm A, Bauer HC, Mandahl N, Nilbert M (2006)  
898 Gene expression profiles relate to SS18/SSX fusion type in synovial sarcoma. *Int J*  
899 *Cancer* 118:1165-72 PMID: 16152617
- 900 29. Kerr JR, Kaushik N, Fear D, Baldwin DA, Nuwaysir EF, Adcock IM (2005) Single-  
901 nucleotide polymorphisms associated with symptomatic infection and differential  
902 human gene expression in healthy seropositive persons each implicate the  
903 cytoskeleton, integrin signaling, and oncosuppression in the pathogenesis of human  
904 parvovirus B19 infection. *J Infect Dis* 192:276-86. <https://doi:10.1086/430950> PMID:  
905 15962222
- 906 30. Chen L, Ma C, Bian Y, Shao C, Wang T, Li J, Chong X, Su L, Lu J (2017) Aberrant  
907 expression of STYK1 and E-cadherin confer a poor prognosis for pancreatic cancer  
908 patients. *Oncotarget* 8:111333-111345. <https://doi:10.18632/oncotarget.22794> PMID:  
909 29340057



- 910 31. Zhao Y, Yang L, He J, Yang H (2017) STYK1 promotes Warburg effect through  
911 PI3K/AKT signaling and predicts a poor prognosis in nasopharyngeal carcinoma.  
912 *Tumour Biol* 39:1010428317711644. <https://doi:10.1177/1010428317711644> PMID:  
913 28720063
- 914 32. Zhou J, Wang F, Liu B, Yang L, Wang X, Liu Y (2017) Knockdown of Serine  
915 Threonine Tyrosine Kinase 1 (STYK1) Inhibits the Migration and Tumorigenesis in  
916 Glioma Cells. *Oncol Res* 25:931-937.  
917 <https://doi:10.3727/096504016X14772424117423> PMID: 27983928
- 918 33. Arch RH, Thompson CB (1998) 4-1BB and Ox40 are members of a tumor necrosis  
919 factor (TNF)-nerve growth factor receptor subfamily that bind TNF receptor-  
920 associated factors and activate nuclear factor kappaB. *Mol Cell Biol*, 18:558-65.  
921 PMID: 9418902
- 922 34. Mignone F, Gissi C, Liuni S, Pesole G (2002) Untranslated regions of mRNAs.  
923 *Genome Biol* 3:REVIEWS0004. PMID: 11897027
- 924 35. Tay Y, Zhang J, Thomson AM, Lim B, Rigoutsos I (2008) MicroRNAs to Nanog,  
925 Oct4 and Sox2 coding regions modulate embryonic stem cell differentiation. *Nature*  
926 455:1124-8. <https://doi:10.1038/nature07299> PMID: 18806776
- 927 36. Ray D, Kazan H, Cook KB, Weirauch MT, Najafabadi HS, Li X, Gueroussov S, Albu  
928 M, Zheng H, Yang A, Na H, Irimia M, Matzat LH, Dale RK, Smith SA, Yarosh CA,  
929 Kelly SM, Nabet B, Mecnas D, Li W, Laishram RS, Qiao M, Lipshitz HD, Piano F,  
930 Corbett AH, Carstens RP, Frey BJ, Anderson RA, Lynch KW, Penalva LO, Lei EP,  
931 Fraser AG, Blencowe BJ, Morris QD, Hughes TR (2013) A compendium of RNA-  
932 binding motifs for decoding gene regulation. *Nature* 499:172-7.  
933 <https://doi:10.1038/nature12311> PMID: 23846655
- 934 37. Geisberg JV, Moqtaderi Z, Fan X, Ozsolak F, Struhl K (2014) Global analysis of  
935 mRNA isoform half-lives reveals stabilizing and destabilizing elements in yeast. *Cell*  
936 156:812-24. <https://doi:10.1016/j.cell.2013.12.026> PMID: 24529382
- 937 38. Frankel LB, Christoffersen NR, Jacobsen A, Lindow M, Krogh A, Lund AH (2008)  
938 Programmed cell death 4 (PDCD4) is an important functional target of the microRNA  
939 miR-21 in breast cancer cells. *J Biol Chem* 283:1026-33.  
940 <https://doi:10.1074/jbc.M707224200> PMID: 17991735
- 941 39. Salmena L, Poliseno L, Tay Y, Kats L, Pandolfi PP (2011) A ceRNA hypothesis: the  
942 Rosetta Stone of a hidden RNA language? *Cell* 146:353-8.  
943 <https://doi:10.1016/j.cell.2011.07.014> PMID: 21802130
- 944 40. Plass M, Rasmussen SH, Krogh A (2017) Highly accessible AU-rich regions in 3'  
945 untranslated regions are hotspots for binding of regulatory factors. *PLoS Comput Biol*  
946 13:e1005460. <https://doi:10.1371/journal.pcbi.1005460> PMID: 28410363
- 947 41. Pozhitkov AE, Noble PA, Bryk J, Tautz D (2014) A revised design for microarray  
948 experiments to account for experimental noise and uncertainty of probe response.  
949 *PLoS One* 9:e91295. <https://doi:10.1371/journal.pone.0091295> PMID: 24618910
- 950 42. Pozhitkov AE, Noble PA (2017) Gene Meter: Accurate abundance calculations of  
951 gene expression. *Commun Integr Biol* 10:e1329785.  
952 <https://doi:10.1080/19420889.2017.1329785> PMID: 28919937

953

954

## SUPPLEMENTARY INFORMATION

- 955  
956  
957 1. Online Resource\_1. Title: Online Resource\_1.docx. Description: Proof that using  
958 the 'Chaos Genome Representation' method to extract mers from the transcript  
959 sequences is more practical (computational efficient) than string-based search  
960 algorithms.  
961  
962 2. Online Resource\_2. Title: Online Resource\_2.xlsx. Description: Two sheets in MS  
963 Excel file: (i) zebrafish\_probes\_PM, and (ii) mouse\_probes\_PM. PM, perfect  
964 match probes. Each sheet has two columns: first column is Agilent Probe ID and  
965 second column is DNA sequence.  
966  
967 3. Online Resource\_3. Title: Online Resource\_3.fna. Description: Two columns in  
968 text file of the over-abundant pool (OP) for the mouse. One column is Agilent  
969 Probe ID linked to Annotated Gene Name and second column is cDNA sequence.  
970 Total of 330 rows.  
971  
972 4. Online Resource\_4. Title: Online Resource\_4.fna. Description: Two columns in  
973 text file of the over-abundant pool (OP) for the zebrafish. One column is Agilent  
974 Probe ID linked to Annotated Gene Name and second column is cDNA sequence.  
975 Total of 230 rows.  
976  
977 5. Online Resource\_5. Title: Online Resource\_5.fna. Description: Two columns in  
978 text file of the control pool (CP) for the mouse. One column is Agilent Probe ID  
979 linked to Annotated Gene Name and second column is cDNA sequence. Total of  
980 32611 rows.  
981  
982 6. Online Resource\_6. Title: Online Resource\_6.fna. Description: Two columns in  
983 text file of the control pool (CP) for the zebrafish. One column is Agilent Probe ID  
984 linked to Annotated Gene Name and second column is cDNA sequence. Total of  
985 27433 rows.  
986  
987 7. Online Resource\_7. Title: Online Resource\_7.xls. Description: Two sheets in MS  
988 Excel file: (i) zebrafish, and (ii) mouse. Each sheet has 4 columns: first column is  
989 string length (strlen) of OP transcript; second column is blank; third column is  
990 string length of the corresponding CP transcript; fourth column is string length  
991 of corresponding CP2 transcript. Rows 1 to 231 in the zebrafish sheet contain  
992 the strlen of 230 transcripts in both OP and CP1 and CP2; rows 233 and 234  
993 contains average and standard deviations of the columns; row 236 contains the  
994 two-tailed t-test results for OP vs CP1 and OP vs CP2. Rows 1 to 334 in the  
995 mouse sheet contain the strlen of 333 transcripts in both OP and CP1 and CP2;  
996 rows 336 and 337 contains average and standard deviations of the columns; row  
997 339 contains the two-tailed t-test results for OP vs CP1 and OP vs CP2.  
998  
999 8. Online Resource\_8. Title: Online Resource\_8.xlsx. Description: Nine sheets in MS  
1000 Excel file. The first sheet provides a detailed Readme that describes the sheets.

- 1001 Basically, first column is abundance of mer in OP, second column is average  
1002 abundance in CP, third column is standard deviation in CP, and remaining 30  
1003 columns are abundances of 30 random draws from CP. Rows differ by mer  
1004 length.  
1005
- 1006 9. Online Resource\_9. Title: Online Resource\_9.xlsx. Description: Nine sheets in MS  
1007 Excel file. The first sheet provides a detailed Readme that describes the sheets.  
1008 Basically, first column is abundance of mer in OP, second column is average  
1009 abundance in CP, third column is standard deviation in CP, and remaining 30  
1010 columns are abundances of 30 random draws from CP. Rows differ by mer  
1011 length.  
1012
- 1013 10. Online Resource\_10. Title: Online Resource\_10.xlsx. Description: 11 sheets in MS  
1014 Excel file. It is similar to the Online Resource\_8 file except the raw data is  
1015 missing to reduce matrix size. The purpose of the sheets is to calculate over- and  
1016 under-abundant mers that are 5 X the standard deviation of the CP for each mer.  
1017 The first sheet provides a detailed Readme that describes the sheets. Rows differ  
1018 by mer length.  
1019
- 1020 11. Online Resource\_11. Title: Online Resource\_11.xlsx. Description: 11 sheets in MS  
1021 Excel file. It is similar to the Online Resource\_9 file except the raw data is  
1022 missing to reduce matrix size. The purpose of the sheets is to calculate over- and  
1023 under-abundant mers that are 5 X the standard deviation of the CP for each mer.  
1024 The first sheet provides a detailed Readme that describes the sheets. Rows differ  
1025 by mer length.  
1026
- 1027 12. Online Resource\_12. Title: Online Resource\_12.xlsx. Description: Multiple sheets  
1028 in MS Excel file. The first sheet provides a detailed Readme that describes the  
1029 sheets. Rows differ by mer length. The matrix file consists of 2245 columns and  
1030 230 rows.  
1031
- 1032 13. Online Resource\_13. Title: Online Resource\_13.xlsx. Description: Multiple sheets  
1033 in MS Excel file. The first sheet provides a detailed Readme that describes the  
1034 sheets. Rows differ by mer length. The matrix file consists of 5117 columns and  
1035 333 rows.  
1036
- 1037 14. Online Resource\_14. Title: Online Resource\_14.xls. Description: Two sheets in  
1038 MS Excel file. The first sheet is the collapsed data of the Zebrafish and the second  
1039 sheet is the collapsed data of the Mouse. Each sheet shows how the data was log  
1040 normalized for making the heatmaps. The collapsed data was based on two way  
1041 cluster groups using Wards linkage methods.  
1042
- 1043 15. Online Resource\_15. Title: Online Resource\_15.xls. Description: Four sheets in  
1044 MS Excel file. The first sheet provides a detailed Readme that describes the  
1045 sheets. The second and third sheets have the number of mer hits by transcript

1046 sequence length for the zebrafish and mouse. The fourth sheet has the  
1047 summarize RegRNA2 output for 10 samples.  
1048  
1049 16. Online Resource\_16. Title: Online Resource\_16.xls. Description: Two sheets in  
1050 MS Excel file. The first sheet is the number of mers by region for the zebrafish  
1051 and the second sheet is the same for the mouse.  
1052  
1053  
1054
